# Supplementary material for: High Throughput Sequencing of Small RNAs in the Two Cucurbita Germplasm with Different Sodium Accumulation Patterns Identifies Novel MicroRNAs Involved in Salt Stress Response
Source: PLoS One. 2015 May 26;10(5):e0127412. doi: 10.1371/journal.pone.0127412 (PMC4444200; doi:10.1371/journal.pone.0127412)
Supplement: S1 Table — (XLSX) [file pone.0127412.s003.xlsx]

## Sheet: Sheet1
S1 Table Primer sequences used for qRT-PCR.
Gene name	Forward Primer sequences	Reversed Primer(5' to 3')
U6	CCTGCGCAAGGATGACACGCAT
miR164e	GCGGCGGTGGAGAAGCAGGG
miR172b	GCGGCGGGCAGCACCATCAAGA
miR172g	GCGGCGGTGGGAATCTTGATGA
miR319g	GCGGCGGTTGGACTGAAGGGA
novel_mir_15	GCGGCGGAAGCTGTGATGAAAA
novel_mir_29	GCGGCGGTCTCTAGTAGACGT
novel_mir_42	GCGGCGGGTTCATGAAAGCTGT
novel_mir_74	GCGGCGGTGGAGAAGCAGGGCAC
novel_mir_79	GCGGCGGAAGGAATGAAGGAA
novel_mir_80	GCGGCGGTTTAAAACGCGTCTA
novel_mir_101	GCGGCGGGCGTCTGTTAGGGAGAG
novel_mir_142	GCGGCGGTGCGATTGTGACAAGT
NAC100	CCCCTAGTCTTCTCAAGCCC	CGGCAAATCACCCATTCAGT
NAC21	AAGGAGGACTGGGTTCTGTG	TAAACCCGGGAGAGATGACG
bHLH30	ACCCGAGCTTCTATCCGATC	GCCTGATGAACCGATGACAC
bHLH147	ATGCGGGAGTCTTCAAGGAA	TCAACGCTCGTACCAGCTTA
WRKY72	CGGCAAGAAGTGAACAACCA	CGTCGGCGGAGAATTACTTG
WRKY21	TCTATTGACTGTCGCGTTGC	GAGGAAGAGAAGGGTGGCTT
MYB48	GGGACAGGAAATCAGAAAGGG	CCGCCACCTTCAAACCTGA
CHX18	GCGATCTCCTCCATGTCTGA	CAACACGAATGCTGCTACGA
ARF18	GGCAGACCCATACTAACCGA	AAGACGAGCCTTCCAATGGA
AIP	TTCTCACTGCTCCGATCTCC	AGTGGAGGTGGGATTGACAG
ACO1	AGCTCGACAAGTGAAGGAGT	TCAGATCTATCACCGGCACC
TCP2	ACCGCCATCTTTCAATTCGG	GATCGGCTACTGGTTCTGGA
TCP24	TGGCAGCGACTACAACCTTA	TGGATCCGTCAACAGGAGAA
