# Supplementary material for: High Throughput Sequencing of Small RNAs in the Two Cucurbita Germplasm with Different Sodium Accumulation Patterns Identifies Novel MicroRNAs Involved in Salt Stress Response
Source: PLoS One. 2015 May 26;10(5):e0127412. doi: 10.1371/journal.pone.0127412 (PMC4444200; doi:10.1371/journal.pone.0127412)
Supplement: S5 Table — 24hR, N12 root under control library; 24hNR, N12 root under salt stress treatment library; 54hR, N15 root under control library; 54hNR, N15 root under salt stress treatment library. (XLSX) [file pone.0127412.s007.xlsx]

## Sheet: 54hR-VS-54hNR
S5 Table Identified target genes of differentially expressed conserved and novel miRNAs in 54hR-vs-54hNR
miR-name	geneID	geneLength	Nr-ID	Nr-Score	Nr-Evalue	Nr-annotation	Nt-ID	Nt-Score	Nt-Evalue	Nt-annotation	Swissprot-ID	Swissprot-Score	Swissprot-Evalue	Swissprot-annotation	COG-Protein-or-Domain	COG-Score	COG-Evalue	COG-ID	COG-Function-Description	KO_id	KEGG-Evalue	KEGG-Score	KEGG-Gene	ko_definition	GO-BiologicalProcess	GO-MolecularFunction	Go-CellularComponent
osa-miR156f-3p	Unigene23942_All	402	--	--	--	--	gi|396578522|gb|JX013990.1|	95.6	3e-17	Manihot esculenta precursor microRNA miR156e gene, complete sequence	--	--	--	--	--	--	--	--	--	--	--	--	--	--	-	-	-
osa-miR156f-4p	Unigene3518_All	535	gi|225459615|ref|XP_002285873.1|	276.2	1e-73	PREDICTED: N-glycosylase/DNA lyase [Vitis vinifera]	gi|359492439|ref|XM_002285837.2|	125	5e-26	PREDICTED: Vitis vinifera N-glycosylase/DNA lyase-like (LOC100264280), mRNA	--	--	--	--	YML060w	115	5e-26	COG0122	3-methyladenine DNA glycosylase/8-oxoguanine DNA glycosylase	K03660	2e-74	276	vvi:100264280	N-glycosylase/DNA lyase [EC:3.2.2.- 4.2.99.18]	GO:0006284//base-excision repair;GO:0006289//nucleotide-excision repair	GO:0008534//oxidized purine nucleobase lesion DNA N-glycosylase activity;GO:0003684//damaged DNA binding	GO:0009507//chloroplast
bna-miR164b	CL1644.Contig1_All	1356	gi|225452871|ref|XP_002283811.1|	302.4	1e-80	PREDICTED: NAC domain-containing protein 100-like [Vitis vinifera]	gi|356512033|ref|XM_003524678.1|	163	6e-37	PREDICTED: Glycine max NAC domain-containing protein 100-like (LOC100798002), mRNA	sp|Q9FLJ2|NC100_ARATH	283	2e-76	NAC domain-containing protein 100 OS=Arabidopsis thaliana GN=NAC100 PE=2 SV=1	--	--	--	--	--	--	--	--	--	--	-	-	-
bna-miR164b	CL1644.Contig2_All	1275	gi|225452871|ref|XP_002283811.1|	317	3e-85	PREDICTED: NAC domain-containing protein 100-like [Vitis vinifera]	gi|356512033|ref|XM_003524678.1|	163	5e-37	PREDICTED: Glycine max NAC domain-containing protein 100-like (LOC100798002), mRNA	sp|Q9FLJ2|NC100_ARATH	296	2e-80	NAC domain-containing protein 100 OS=Arabidopsis thaliana GN=NAC100 PE=2 SV=1	--	--	--	--	--	--	--	--	--	--	-	-	-
bna-miR164b	CL1644.Contig3_All	1374	gi|225452871|ref|XP_002283811.1|	301.2	2e-80	PREDICTED: NAC domain-containing protein 100-like [Vitis vinifera]	gi|356512033|ref|XM_003524678.1|	163	6e-37	PREDICTED: Glycine max NAC domain-containing protein 100-like (LOC100798002), mRNA	sp|Q9FLJ2|NC100_ARATH	282	4e-76	NAC domain-containing protein 100 OS=Arabidopsis thaliana GN=NAC100 PE=2 SV=1	--	--	--	--	--	--	--	--	--	--	-	-	-
bna-miR164b	CL2098.Contig1_All	774	gi|255647843|gb|ACU24381.1|	251.5	9e-66	unknown [Glycine max]	gi|357451392|ref|XM_003595925.1|	85.7	6e-14	Medicago truncatula NAC domain protein (MTR_2g064470) mRNA, complete cds	sp|Q84TE6|NAC22_ARATH	189	1e-48	NAC domain-containing protein 21/22 OS=Arabidopsis thaliana GN=NAC021 PE=1 SV=2	--	--	--	--	--	--	--	--	--	--	GO:0010072//primary shoot apical meristem specification;GO:0048527//lateral root development;GO:0006351//transcription, DNA-dependent;GO:0009734//auxin mediated signaling pathway	GO:0003700//sequence-specific DNA binding transcription factor activity	-
bna-miR164b	CL2098.Contig2_All	1154	gi|255647843|gb|ACU24381.1|	417.2	2e-115	unknown [Glycine max]	gi|34558776|gb|AY308828.1|	131	2e-27	Capsicum annuum salicylic acid-induced protein 19 gene, complete cds	sp|Q84TE6|NAC22_ARATH	331	5e-91	NAC domain-containing protein 21/22 OS=Arabidopsis thaliana GN=NAC021 PE=1 SV=2	--	--	--	--	--	--	--	--	--	--	GO:0010072//primary shoot apical meristem specification;GO:0048527//lateral root development;GO:0006351//transcription, DNA-dependent;GO:0009734//auxin mediated signaling pathway	GO:0003700//sequence-specific DNA binding transcription factor activity	-
bna-miR164b	CL2098.Contig3_All	1119	gi|255647843|gb|ACU24381.1|	416	4e-115	unknown [Glycine max]	gi|34558776|gb|AY308828.1|	109	6e-21	Capsicum annuum salicylic acid-induced protein 19 gene, complete cds	sp|Q84TE6|NAC22_ARATH	330	1e-90	NAC domain-containing protein 21/22 OS=Arabidopsis thaliana GN=NAC021 PE=1 SV=2	--	--	--	--	--	--	--	--	--	--	GO:0010072//primary shoot apical meristem specification;GO:0048527//lateral root development;GO:0006351//transcription, DNA-dependent;GO:0009734//auxin mediated signaling pathway	GO:0003700//sequence-specific DNA binding transcription factor activity	-
bna-miR164b	CL2305.Contig1_All	1243	gi|255556707|ref|XP_002519387.1|	610.9	1e-173	tfiif-alpha, putative [Ricinus communis] >gi|223541454|gb|EEF43004.1| tfiif-alpha, putative [Ricinus communis]	gi|359495562|ref|XM_002262762.2|	355	7e-95	PREDICTED: Vitis vinifera transcription initiation factor IIF subunit alpha-like (LOC100253654), mRNA	sp|Q9SU25|T2FA_ARATH	516	1e-146	Transcription initiation factor IIF subunit alpha OS=Arabidopsis thaliana GN=RAP74 PE=1 SV=1	YOR054c	65.1	2e-10	COG0452	Phosphopantothenoylcysteine synthetase/decarboxylase	K03138	1e-174	610	rcu:RCOM_1299530	transcription initiation factor TFIIF subunit alpha	GO:0006367//transcription initiation from RNA polymerase II promoter;GO:0015979//photosynthesis	GO:0003677//DNA binding;GO:0003824//catalytic activity	GO:0016021//integral to membrane;GO:0005634//nucleus;GO:0009522//photosystem I
bna-miR164b	CL4255.Contig6_All	2279	gi|297735328|emb|CBI17768.3|	864.8	0	unnamed protein product [Vitis vinifera]	gi|359485033|ref|XM_002277484.2|	866	0	PREDICTED: Vitis vinifera xylose isomerase-like (LOC100254769), mRNA	sp|Q9FKK7|XYLA_ARATH	841	0	Xylose isomerase OS=Arabidopsis thaliana GN=XYLA PE=2 SV=2	TM1667	495	1e-139	COG2115	Xylose isomerase	K01805	0	859	rcu:RCOM_0077940	xylose isomerase [EC:5.3.1.5]	GO:0006098//pentose-phosphate shunt;GO:0042732//D-xylose metabolic process	GO:0009045//xylose isomerase activity;GO:0000287//magnesium ion binding	GO:0005774//vacuolar membrane;GO:0016023//cytoplasmic membrane-bounded vesicle;GO:0005783//endoplasmic reticulum
bna-miR164b	CL4950.Contig2_All	390	--	--	--	--	--	--	--	--	--	--	--	--	--	--	--	--	--	--	--	--	--	--	-	-	-
bna-miR164b	CL5510.Contig1_All	4293	gi|359475856|ref|XP_003631763.1|	1884.4	0	PREDICTED: trafficking protein particle complex subunit 9-like isoform 2 [Vitis vinifera]	gi|359475855|ref|XM_003631715.1|	938	0	PREDICTED: Vitis vinifera trafficking protein particle complex subunit 9-like, transcript variant 2 (LOC100259475), mRNA	--	--	--	--	--	--	--	--	--	--	--	--	--	--	GO:0000910//cytokinesis	-	-
bna-miR164b	CL7265.Contig1_All	431	gi|255547357|ref|XP_002514736.1|	80.9	5e-15	NAC domain-containing protein 21/22, putative [Ricinus communis] >gi|223546340|gb|EEF47842.1| NAC domain-containing protein 21/22, putative [Ricinus communis]	--	--	--	--	--	--	--	--	--	--	--	--	--	--	--	--	--	--	-	-	-
bna-miR164b	Unigene23509_All	269	gi|356546856|ref|XP_003541838.1|	53.9	7e-07	PREDICTED: protein CUP-SHAPED COTYLEDON 2-like [Glycine max]	--	--	--	--	--	--	--	--	--	--	--	--	--	--	--	--	--	--	-	-	-
zma-miR164h-5p	CL1644.Contig1_All	1356	gi|225452871|ref|XP_002283811.1|	302.4	1e-80	PREDICTED: NAC domain-containing protein 100-like [Vitis vinifera]	gi|356512033|ref|XM_003524678.1|	163	6e-37	PREDICTED: Glycine max NAC domain-containing protein 100-like (LOC100798002), mRNA	sp|Q9FLJ2|NC100_ARATH	283	2e-76	NAC domain-containing protein 100 OS=Arabidopsis thaliana GN=NAC100 PE=2 SV=1	--	--	--	--	--	--	--	--	--	--	-	-	-
zma-miR164h-5p	CL1644.Contig2_All	1275	gi|225452871|ref|XP_002283811.1|	317	3e-85	PREDICTED: NAC domain-containing protein 100-like [Vitis vinifera]	gi|356512033|ref|XM_003524678.1|	163	5e-37	PREDICTED: Glycine max NAC domain-containing protein 100-like (LOC100798002), mRNA	sp|Q9FLJ2|NC100_ARATH	296	2e-80	NAC domain-containing protein 100 OS=Arabidopsis thaliana GN=NAC100 PE=2 SV=1	--	--	--	--	--	--	--	--	--	--	-	-	-
zma-miR164h-5p	CL1644.Contig3_All	1374	gi|225452871|ref|XP_002283811.1|	301.2	2e-80	PREDICTED: NAC domain-containing protein 100-like [Vitis vinifera]	gi|356512033|ref|XM_003524678.1|	163	6e-37	PREDICTED: Glycine max NAC domain-containing protein 100-like (LOC100798002), mRNA	sp|Q9FLJ2|NC100_ARATH	282	4e-76	NAC domain-containing protein 100 OS=Arabidopsis thaliana GN=NAC100 PE=2 SV=1	--	--	--	--	--	--	--	--	--	--	-	-	-
zma-miR164h-5p	CL2098.Contig1_All	774	gi|255647843|gb|ACU24381.1|	251.5	9e-66	unknown [Glycine max]	gi|357451392|ref|XM_003595925.1|	85.7	6e-14	Medicago truncatula NAC domain protein (MTR_2g064470) mRNA, complete cds	sp|Q84TE6|NAC22_ARATH	189	1e-48	NAC domain-containing protein 21/22 OS=Arabidopsis thaliana GN=NAC021 PE=1 SV=2	--	--	--	--	--	--	--	--	--	--	GO:0010072//primary shoot apical meristem specification;GO:0048527//lateral root development;GO:0006351//transcription, DNA-dependent;GO:0009734//auxin mediated signaling pathway	GO:0003700//sequence-specific DNA binding transcription factor activity	-
zma-miR164h-5p	CL2098.Contig2_All	1154	gi|255647843|gb|ACU24381.1|	417.2	2e-115	unknown [Glycine max]	gi|34558776|gb|AY308828.1|	131	2e-27	Capsicum annuum salicylic acid-induced protein 19 gene, complete cds	sp|Q84TE6|NAC22_ARATH	331	5e-91	NAC domain-containing protein 21/22 OS=Arabidopsis thaliana GN=NAC021 PE=1 SV=2	--	--	--	--	--	--	--	--	--	--	GO:0010072//primary shoot apical meristem specification;GO:0048527//lateral root development;GO:0006351//transcription, DNA-dependent;GO:0009734//auxin mediated signaling pathway	GO:0003700//sequence-specific DNA binding transcription factor activity	-
zma-miR164h-5p	CL2098.Contig3_All	1119	gi|255647843|gb|ACU24381.1|	416	4e-115	unknown [Glycine max]	gi|34558776|gb|AY308828.1|	109	6e-21	Capsicum annuum salicylic acid-induced protein 19 gene, complete cds	sp|Q84TE6|NAC22_ARATH	330	1e-90	NAC domain-containing protein 21/22 OS=Arabidopsis thaliana GN=NAC021 PE=1 SV=2	--	--	--	--	--	--	--	--	--	--	GO:0010072//primary shoot apical meristem specification;GO:0048527//lateral root development;GO:0006351//transcription, DNA-dependent;GO:0009734//auxin mediated signaling pathway	GO:0003700//sequence-specific DNA binding transcription factor activity	-
zma-miR164h-5p	CL2098.Contig4_All	1859	gi|297735328|emb|CBI17768.3|	863.2	0	unnamed protein product [Vitis vinifera]	gi|359485033|ref|XM_002277484.2|	866	0	PREDICTED: Vitis vinifera xylose isomerase-like (LOC100254769), mRNA	sp|Q9FKK7|XYLA_ARATH	836	0	Xylose isomerase OS=Arabidopsis thaliana GN=XYLA PE=2 SV=2	TM1667	491	2e-138	COG2115	Xylose isomerase	K01805	0	858	rcu:RCOM_0077940	xylose isomerase [EC:5.3.1.5]	GO:0006098//pentose-phosphate shunt;GO:0042732//D-xylose metabolic process	GO:0009045//xylose isomerase activity;GO:0000287//magnesium ion binding	GO:0005774//vacuolar membrane;GO:0016023//cytoplasmic membrane-bounded vesicle;GO:0005783//endoplasmic reticulum
zma-miR164h-5p	CL2098.Contig5_All	1859	gi|297735328|emb|CBI17768.3|	863.2	0	unnamed protein product [Vitis vinifera]	gi|359485033|ref|XM_002277484.2|	866	0	PREDICTED: Vitis vinifera xylose isomerase-like (LOC100254769), mRNA	sp|Q9FKK7|XYLA_ARATH	836	0	Xylose isomerase OS=Arabidopsis thaliana GN=XYLA PE=2 SV=2	TM1667	491	2e-138	COG2115	Xylose isomerase	K01805	0	858	rcu:RCOM_0077940	xylose isomerase [EC:5.3.1.5]	GO:0006098//pentose-phosphate shunt;GO:0042732//D-xylose metabolic process	GO:0009045//xylose isomerase activity;GO:0000287//magnesium ion binding	GO:0005774//vacuolar membrane;GO:0016023//cytoplasmic membrane-bounded vesicle;GO:0005783//endoplasmic reticulum
zma-miR164h-5p	CL2098.Contig6_All	1840	gi|297735328|emb|CBI17768.3|	863.2	0	unnamed protein product [Vitis vinifera]	gi|359485033|ref|XM_002277484.2|	866	0	PREDICTED: Vitis vinifera xylose isomerase-like (LOC100254769), mRNA	sp|Q9FKK7|XYLA_ARATH	836	0	Xylose isomerase OS=Arabidopsis thaliana GN=XYLA PE=2 SV=2	TM1667	491	2e-138	COG2115	Xylose isomerase	K01805	0	858	rcu:RCOM_0077940	xylose isomerase [EC:5.3.1.5]	GO:0006098//pentose-phosphate shunt;GO:0042732//D-xylose metabolic process	GO:0009045//xylose isomerase activity;GO:0000287//magnesium ion binding	GO:0005774//vacuolar membrane;GO:0016023//cytoplasmic membrane-bounded vesicle;GO:0005783//endoplasmic reticulum
zma-miR164h-5p	CL2098.Contig7_All	390	--	--	--	--	--	--	--	--	--	--	--	--	--	--	--	--	--	--	--	--	--	--	-	-	-
zma-miR164h-5p	CL2098.Contig8_All	1134	gi|255547357|ref|XP_002514736.1|	392.9	4e-108	NAC domain-containing protein 21/22, putative [Ricinus communis] >gi|223546340|gb|EEF47842.1| NAC domain-containing protein 21/22, putative [Ricinus communis]	gi|225452870|ref|XM_002283775.1|	167	3e-38	PREDICTED: Vitis vinifera NAC domain-containing protein 100-like (LOC100250998), mRNA	sp|Q9FLJ2|NC100_ARATH	360	1e-99	NAC domain-containing protein 100 OS=Arabidopsis thaliana GN=NAC100 PE=2 SV=1	--	--	--	--	--	--	--	--	--	--	GO:0007275//multicellular organismal development	GO:0003700//sequence-specific DNA binding transcription factor activity	-
zma-miR164h-5p	CL2098.Contig9_All	2868	gi|255560161|ref|XP_002521098.1|	1060.4	0	protein binding protein, putative [Ricinus communis] >gi|223539667|gb|EEF41249.1| protein binding protein, putative [Ricinus communis]	gi|259156800|gb|GQ856148.1|	852	0	Cucurbita pepo mitochondrion, complete genome	sp|Q9FKB6|Y5880_ARATH	914	0	BTB/POZ domain-containing protein At5g48800 OS=Arabidopsis thaliana GN=At5g48800 PE=1 SV=1	CC1270	51.6	7e-06	COG0099	Ribosomal protein S13	K02952	7e-12	71.6	rcu:RCOM_Mp20	small subunit ribosomal protein S13	GO:0009416//response to light stimulus;GO:0007165//signal transduction	GO:0004871//signal transducer activity	GO:0005886//plasma membrane
zma-miR164h-5p	CL2098.Contig10_All	269	gi|356546856|ref|XP_003541838.1|	53.9	7e-07	PREDICTED: protein CUP-SHAPED COTYLEDON 2-like [Glycine max]	--	--	--	--	--	--	--	--	--	--	--	--	--	--	--	--	--	--	-	-	-
zma-miR164h-5p	CL2098.Contig11_All	2939	gi|356504837|ref|XP_003521201.1|	1481.8	0	PREDICTED: multiple C2 and transmembrane domain-containing protein 2-like isoform 1 [Glycine max] >gi|356504839|ref|XP_003521202.1| PREDICTED: multiple C2 and transmembrane domain-containing protein 2-like isoform 2 [Glycine max]	gi|328887980|gb|AC244286.4|	664	0	Solanum lycopersicum strain Heinz 1706 chromosome 10 clone hba-20a14 map 10, complete sequence	sp|Q9ZVT9|C2GR1_ARATH	73.9	5e-13	C2 and GRAM domain-containing protein At1g03370 OS=Arabidopsis thaliana GN=At1g03370 PE=2 SV=4	--	--	--	--	--	--	--	--	--	--	-	-	GO:0005618//cell wall;GO:0005783//endoplasmic reticulum
osa-miR166b-5p	CL2098.Contig12_All	1149	--	--	--	--	gi|13429835|dbj|AB049134.1|	119	6e-24	Cucurbita moschata CmATS1;1 gene for acyl-(acyl-carrier-protein): glycerol-3-phosphate acyltransferase, complete cds	--	--	--	--	--	--	--	--	--	--	--	--	--	--	-	-	-
osa-miR166b-5p	CL2098.Contig13_All	1057	--	--	--	--	gi|13429835|dbj|AB049134.1|	119	6e-24	Cucurbita moschata CmATS1;1 gene for acyl-(acyl-carrier-protein): glycerol-3-phosphate acyltransferase, complete cds	--	--	--	--	--	--	--	--	--	--	--	--	--	--	-	-	-
osa-miR166b-5p	CL2098.Contig14_All	222	--	--	--	--	gi|199580016|gb|AC189334.2|	60	9e-07	Brassica rapa subsp. pekinensis clone KBrB038O16, complete sequence	--	--	--	--	--	--	--	--	--	--	--	--	--	--	-	-	-
osa-miR166b-5p	CL2098.Contig15_All	534	--	--	--	--	gi|147807330|emb|AM480719.2|	65.9	4e-08	Vitis vinifera contig VV78X126014.8, whole genome shotgun sequence	--	--	--	--	--	--	--	--	--	--	--	--	--	--	-	-	-
aly-miR168a-3p	CL2098.Contig16_All	288	--	--	--	--	gi|302030873|gb|HM627263.1|	79.8	1e-12	Populus suaveolens miR168b microRNA locus genomic sequence	--	--	--	--	--	--	--	--	--	--	--	--	--	--	-	-	-
aly-miR168a-3p	CL2098.Contig17_All	308	--	--	--	--	--	--	--	--	--	--	--	--	--	--	--	--	--	--	--	--	--	--	-	-	-
aly-miR168a-3p	CL2098.Contig18_All	1810	gi|225441840|ref|XP_002278289.1|	555.1	1e-156	PREDICTED: cytoplasmic tRNA 2-thiolation protein 2 [Vitis vinifera] >gi|297739656|emb|CBI29838.3| unnamed protein product [Vitis vinifera]	gi|225441839|ref|XM_002278253.1|	163	7e-37	PREDICTED: Vitis vinifera cytoplasmic tRNA 2-thiolation protein 2-like (LOC100252179), mRNA	sp|O65628|CTU2_ARATH	538	5e-153	Cytoplasmic tRNA 2-thiolation protein 2 OS=Arabidopsis thaliana GN=CTU2 PE=2 SV=3	--	--	--	--	--	K14169	1e-157	555	vvi:100252179	cytoplasmic tRNA 2-thiolation protein 2	-	-	-
osa-miR169d	CL2098.Contig19_All	1114	gi|356566267|ref|XP_003551355.1|	275.4	1e-72	PREDICTED: nuclear transcription factor Y subunit A-1-like [Glycine max]	gi|356566266|ref|XM_003551307.1|	204	1e-49	PREDICTED: Glycine max nuclear transcription factor Y subunit A-1-like (LOC100808378), mRNA	sp|Q945M9|NFYA9_ARATH	203	2e-52	Nuclear transcription factor Y subunit A-9 OS=Arabidopsis thaliana GN=NFYA9 PE=2 SV=1	YGL237c	89.4	1e-17	COG5224	CCAAT-binding factor, subunit B	K08064	6e-36	149	gmx:100782085	nuclear transcription factor Y, alpha	-	-	GO:0005634//nucleus
osa-miR169d	CL2098.Contig20_All	1615	gi|225442963|ref|XP_002267149.1|	201.8	2e-50	PREDICTED: uncharacterized protein LOC100249094 isoform 1 [Vitis vinifera]	--	--	--	--	sp|Q9XI36|MBD10_ARATH	181	1e-45	Methyl-CpG-binding domain-containing protein 10 OS=Arabidopsis thaliana GN=MBD10 PE=1 SV=1	SPAC140.02	52.4	2e-06	COG0724	RNA-binding proteins (RRM domain)	K11294	5e-10	64.3	osa:4337032	nucleolin	-	-	GO:0005634//nucleus
osa-miR169d	CL2098.Contig21_All	2170	gi|297742917|emb|CBI35784.3|	1023.5	0	unnamed protein product [Vitis vinifera]	gi|225441952|ref|XM_002263116.1|	147	5e-32	PREDICTED: Vitis vinifera protein STRUBBELIG-RECEPTOR FAMILY 6-like, transcript variant 2 (LOC100249831), mRNA	sp|Q9LUL4|SRF7_ARATH	886	0	Protein STRUBBELIG-RECEPTOR FAMILY 7 OS=Arabidopsis thaliana GN=SRF7 PE=1 SV=1	ECU01g0630	85.9	3e-16	COG0515	Serine/threonine protein kinase	K13430	2e-66	252	pop:POPTR_413452	serine/threonine-protein kinase PBS1 [EC:2.7.11.1]	GO:0006468//protein phosphorylation;GO:0007169//transmembrane receptor protein tyrosine kinase signaling pathway	GO:0005524//ATP binding;GO:0004674//protein serine/threonine kinase activity	GO:0016023//cytoplasmic membrane-bounded vesicle;GO:0005886//plasma membrane;GO:0016021//integral to membrane;GO:0005634//nucleus;GO:0005829//cytosol
osa-miR169d	CL2098.Contig22_All	1306	gi|356566267|ref|XP_003551355.1|	324.3	2e-87	PREDICTED: nuclear transcription factor Y subunit A-1-like [Glycine max]	gi|388523188|gb|JQ918270.1|	151	2e-33	Medicago truncatula nuclear transcription factor Y subunit A5 (NF-YA5) mRNA, complete cds	sp|Q9LXV5|NFYA1_ARATH	216	2e-56	Nuclear transcription factor Y subunit A-1 OS=Arabidopsis thaliana GN=NFYA1 PE=2 SV=1	YGL237c	82	2e-15	COG5224	CCAAT-binding factor, subunit B	K08064	9e-39	159	gmx:100782085	nuclear transcription factor Y, alpha	GO:0048510//regulation of timing of transition from vegetative to reproductive phase	GO:0003700//sequence-specific DNA binding transcription factor activity	GO:0005634//nucleus
osa-miR169d	CL2098.Contig23_All	717	gi|255544876|ref|XP_002513499.1|	99.4	5e-20	Nuclear transcription factor Y subunit A-1, putative [Ricinus communis] >gi|223547407|gb|EEF48902.1| Nuclear transcription factor Y subunit A-1, putative [Ricinus communis]	gi|356566266|ref|XM_003551307.1|	63.9	2e-07	PREDICTED: Glycine max nuclear transcription factor Y subunit A-1-like (LOC100808378), mRNA	--	--	--	--	--	--	--	--	--	--	--	--	--	--	-	-	-
cme-miR169i	CL2098.Contig24_All	1294	gi|225463280|ref|XP_002263793.1|	306.2	6e-82	PREDICTED: nuclear transcription factor Y subunit A-10-like [Vitis vinifera]	gi|225463279|ref|XM_002263757.1|	93.7	4e-16	PREDICTED: Vitis vinifera nuclear transcription factor Y subunit A-10-like (LOC100255650), mRNA	sp|Q9M9X4|NFYA2_ARATH	179	2e-45	Nuclear transcription factor Y subunit A-2 OS=Arabidopsis thaliana GN=NFYA2 PE=2 SV=1	YGL237c	86.7	8e-17	COG5224	CCAAT-binding factor, subunit B	K08064	4e-28	124	gmx:100782085	nuclear transcription factor Y, alpha	GO:0006351//transcription, DNA-dependent	-	-
cme-miR169i	CL2098.Contig25_All	1138	gi|225463280|ref|XP_002263793.1|	270.4	3e-71	PREDICTED: nuclear transcription factor Y subunit A-10-like [Vitis vinifera]	gi|225463279|ref|XM_002263757.1|	93.7	4e-16	PREDICTED: Vitis vinifera nuclear transcription factor Y subunit A-10-like (LOC100255650), mRNA	sp|Q9M9X4|NFYA2_ARATH	172	3e-43	Nuclear transcription factor Y subunit A-2 OS=Arabidopsis thaliana GN=NFYA2 PE=2 SV=1	YGL237c	86.7	7e-17	COG5224	CCAAT-binding factor, subunit B	K08064	4e-28	124	gmx:100782085	nuclear transcription factor Y, alpha	GO:0006351//transcription, DNA-dependent;GO:0009567//double fertilization forming a zygote and endosperm	GO:0003700//sequence-specific DNA binding transcription factor activity	-
cme-miR169i	CL2098.Contig26_All	1407	gi|225463280|ref|XP_002263793.1|	290.8	3e-77	PREDICTED: nuclear transcription factor Y subunit A-10-like [Vitis vinifera]	gi|225463279|ref|XM_002263757.1|	139	8e-30	PREDICTED: Vitis vinifera nuclear transcription factor Y subunit A-10-like (LOC100255650), mRNA	sp|Q8LFU0|NFYAA_ARATH	164	9e-41	Nuclear transcription factor Y subunit A-10 OS=Arabidopsis thaliana GN=NFYA10 PE=2 SV=2	YGL237c	85.1	3e-16	COG5224	CCAAT-binding factor, subunit B	K08064	3e-27	121	gmx:100782085	nuclear transcription factor Y, alpha	-	-	-
cme-miR169i	CL2098.Contig27_All	998	gi|224138282|ref|XP_002322775.1|	206.5	5e-52	predicted protein [Populus trichocarpa] >gi|222867405|gb|EEF04536.1| predicted protein [Populus trichocarpa]	gi|225463279|ref|XM_002263757.1|	93.7	3e-16	PREDICTED: Vitis vinifera nuclear transcription factor Y subunit A-10-like (LOC100255650), mRNA	sp|Q9M9X4|NFYA2_ARATH	135	3e-32	Nuclear transcription factor Y subunit A-2 OS=Arabidopsis thaliana GN=NFYA2 PE=2 SV=1	YGL237c	85.1	2e-16	COG5224	CCAAT-binding factor, subunit B	K08064	1e-25	115	gmx:100782085	nuclear transcription factor Y, alpha	GO:0006351//transcription, DNA-dependent;GO:0009567//double fertilization forming a zygote and endosperm	GO:0003700//sequence-specific DNA binding transcription factor activity	-
ath-miR171c	CL2098.Contig28_All	263	--	--	--	--	gi|396578611|gb|JX014079.1|	69.9	1e-09	Manihot esculenta precursor microRNA miR171c gene, complete sequence	--	--	--	--	--	--	--	--	--	--	--	--	--	--	-	-	-
ath-miR171c	CL2098.Contig29_All	909	gi|21322711|emb|CAD22154.1|	180.6	2e-44	pherophorin-dz1 protein [Volvox carteri f. nagariensis]	gi|189162374|dbj|AP005602.1|	67.9	2e-08	Lotus japonicus genomic DNA, chromosome 2, clone: LjT47I01, TM0520, complete sequence	sp|P10496|GRP2_PHAVU	238	5e-63	Glycine-rich cell wall structural protein 1.8 OS=Phaseolus vulgaris PE=2 SV=1	XF0818	174	2e-43	COG2730	Endoglucanase	K14709	9e-50	195	vcn:VOLCADRAFT_104214	solute carrier family 39 (zinc transporter), member 1/2/3	GO:0010087//phloem or xylem histogenesis;GO:0010588//cotyledon vascular tissue pattern formation;GO:0010305//leaf vascular tissue pattern formation;GO:0048366//leaf development	-	-
aly-miR172b-5p	CL2098.Contig30_All
aly-miR172b-5p	CL2098.Contig31_All	4439	gi|225447543|ref|XP_002268724.1|	1683.7	0	PREDICTED: phytochrome C [Vitis vinifera]	gi|257852917|gb|FJ669961.1|	846	0	Cucumis sativus phytochrome C (PHYC) gene, partial cds	sp|Q10CQ8|PHYC_ORYSJ	1495	0	Phytochrome C OS=Oryza sativa subsp. japonica GN=PHYC PE=2 SV=1	slr0473	246	2e-64	COG4251	Bacteriophytochrome (light-regulated signal transduction histidine kinase)	K12121	0	1318	ppp:PHYPADRAFT_218861	phytochrome B	GO:0009585//red, far-red light phototransduction;GO:0000160//two-component signal transduction system (phosphorelay);GO:0017006//protein-tetrapyrrole linkage;GO:0018106//peptidyl-histidine phosphorylation;GO:0006355//regulation of transcription, DNA-dependent;GO:0018298//protein-chromophore linkage;GO:0009584//detection of visible light	GO:0005524//ATP binding;GO:0008020//G-protein coupled photoreceptor activity;GO:0042803//protein homodimerization activity;GO:0000155//two-component sensor activity	GO:0016020//membrane
aly-miR172b-5p	CL2098.Contig32_All	715	gi|302843366|ref|XP_002953225.1|	57	2e-07	hypothetical protein VOLCADRAFT_63308 [Volvox carteri f. nagariensis] >gi|300261612|gb|EFJ45824.1| hypothetical protein VOLCADRAFT_63308 [Volvox carteri f. nagariensis]	--	--	--	--	sp|Q9LFR3|GASAE_ARATH	58.5	4e-09	Gibberellin-regulated protein 14 OS=Arabidopsis thaliana GN=GASA14 PE=1 SV=1	--	--	--	--	--	K01115	2e-07	53.9	vcn:VOLCADRAFT_99471	phospholipase D [EC:3.1.4.4]	-	-	-
cme-miR319d	CL2098.Contig33_All	2804	gi|357492255|ref|XP_003616416.1|	457.6	4e-127	Telomeric DNA-binding protein [Medicago truncatula] >gi|355517751|gb|AES99374.1| Telomeric DNA-binding protein [Medicago truncatula]	gi|359486623|ref|XM_002278407.2|	202	1e-48	PREDICTED: Vitis vinifera telomere repeat-binding protein 4-like (LOC100259786), mRNA	sp|Q9FFY9|TRP4_ARATH	243	6e-64	Telomere repeat-binding protein 4 OS=Arabidopsis thaliana GN=TRP4 PE=1 SV=1	--	--	--	--	--	--	--	--	--	--	-	GO:0003677//DNA binding	-
cme-miR319d	CL2098.Contig34_All	2219	gi|296086220|emb|CBI31661.3|	565.8	9e-160	unnamed protein product [Vitis vinifera]	gi|359486623|ref|XM_002278407.2|	202	1e-48	PREDICTED: Vitis vinifera telomere repeat-binding protein 4-like (LOC100259786), mRNA	sp|Q9FFY9|TRP4_ARATH	445	4e-125	Telomere repeat-binding protein 4 OS=Arabidopsis thaliana GN=TRP4 PE=1 SV=1	--	--	--	--	--	--	--	--	--	--	GO:0044260;GO:0090304;GO:0065007//biological regulation	GO:0003691//double-stranded telomeric DNA binding;GO:0005515//protein binding	GO:0000781//chromosome, telomeric region
cme-miR319d	CL2098.Contig35_All	2698	gi|296086220|emb|CBI31661.3|	573.5	5e-162	unnamed protein product [Vitis vinifera]	gi|359478929|ref|XM_002283353.2|	129	2e-26	PREDICTED: Vitis vinifera telomere repeat-binding protein 5-like (LOC100257090), mRNA	sp|Q9FFY9|TRP4_ARATH	443	3e-124	Telomere repeat-binding protein 4 OS=Arabidopsis thaliana GN=TRP4 PE=1 SV=1	--	--	--	--	--	--	--	--	--	--	GO:0044260;GO:0090304	GO:0003691//double-stranded telomeric DNA binding;GO:0005515//protein binding	GO:0000781//chromosome, telomeric region
cme-miR319d	CL2098.Contig36_All	2715	gi|225438972|ref|XP_002284310.1|	840.9	0	PREDICTED: formamidase isoform 2 [Vitis vinifera] >gi|296087335|emb|CBI33709.3| unnamed protein product [Vitis vinifera]	gi|225438973|ref|XM_002284282.1|	537	1e-149	PREDICTED: Vitis vinifera formamidase-like (LOC100250701), mRNA	--	--	--	--	SPAC869.04	403	7e-112	COG2421	Predicted acetamidase/formamidase	K01455	0	826	pop:POPTR_818419	formamidase [EC:3.5.1.49]	GO:0008152//metabolic process	GO:0004328//formamidase activity	GO:0005773//vacuole
cme-miR319d	CL2098.Contig37_All	2523	gi|224084437|ref|XP_002307296.1|	297.7	0	predicted protein [Populus trichocarpa] >gi|222856745|gb|EEE94292.1| predicted protein [Populus trichocarpa]	gi|225438977|ref|XM_002284293.1|	341	2e-90	PREDICTED: Vitis vinifera uncharacterized LOC100267891 (LOC100267891), mRNA	--	--	--	--	SPAC869.04	251	3e-66	COG2421	Predicted acetamidase/formamidase	K01455	0	488	pop:POPTR_818419	formamidase [EC:3.5.1.49]	GO:0008152//metabolic process	GO:0016811//hydrolase activity, acting on carbon-nitrogen (but not peptide) bonds, in linear amides	-
cme-miR319d	CL2098.Contig38_All	2358	gi|224084437|ref|XP_002307296.1|	297.7	0	predicted protein [Populus trichocarpa] >gi|222856745|gb|EEE94292.1| predicted protein [Populus trichocarpa]	gi|225438973|ref|XM_002284282.1|	335	1e-88	PREDICTED: Vitis vinifera formamidase-like (LOC100250701), mRNA	--	--	--	--	SPAC869.04	188	4e-47	COG2421	Predicted acetamidase/formamidase	K01455	0	370	pop:POPTR_818419	formamidase [EC:3.5.1.49]	GO:0008152//metabolic process	GO:0004328//formamidase activity	-
cme-miR319d	CL2098.Contig39_All	2324	gi|255568565|ref|XP_002525256.1|	725.7	0	Acetamidase, putative [Ricinus communis] >gi|223535414|gb|EEF37084.1| Acetamidase, putative [Ricinus communis]	gi|225438973|ref|XM_002284282.1|	537	1e-149	PREDICTED: Vitis vinifera formamidase-like (LOC100250701), mRNA	--	--	--	--	SPAC869.04	340	8e-93	COG2421	Predicted acetamidase/formamidase	K01455	0	725	rcu:RCOM_0578730	formamidase [EC:3.5.1.49]	GO:0008152//metabolic process	GO:0004328//formamidase activity	GO:0005773//vacuole
cme-miR319d	CL2098.Contig40_All	3569	gi|255540653|ref|XP_002511391.1|	1594.3	0	Pantothenate kinase, putative [Ricinus communis] >gi|223550506|gb|EEF51993.1| Pantothenate kinase, putative [Ricinus communis]	gi|225457016|ref|XM_002279043.1|	1469	0	PREDICTED: Vitis vinifera pantothenate kinase 2-like (LOC100255260), mRNA	sp|Q8L5Y9|PANK2_ARATH	1506	0	Pantothenate kinase 2 OS=Arabidopsis thaliana GN=At4g32180 PE=1 SV=2	SPBC4B4.01c	309	2e-83	COG5146	Pantothenate kinase, acetyl-CoA regulated	K09680	0	1594	rcu:RCOM_1510490	type II pantothenate kinase [EC:2.7.1.33]	GO:0015937//coenzyme A biosynthetic process;GO:0016310//phosphorylation	GO:0005515//protein binding;GO:0005524//ATP binding;GO:0004594//pantothenate kinase activity	-
cme-miR319d	CL2098.Contig41_All	408	--	--	--	--	--	--	--	--	--	--	--	--	--	--	--	--	--	--	--	--	--	--	-	-	-
cme-miR319d	CL2098.Contig42_All	1965	gi|343197862|gb|AEM05868.1|	352.1	1e-95	teosinte ranched/cycloidea/pcf family member [Lithospermum erythrorhizon]	gi|292683041|dbj|AK339593.1|	121	3e-24	Lotus japonicus cDNA, clone: LjFL3-033-CA03, HTC	sp|Q8LPR5|TCP4_ARATH	317	2e-86	Transcription factor TCP4 OS=Arabidopsis thaliana GN=TCP4 PE=2 SV=1	--	--	--	--	--	--	--	--	--	--	GO:0009965//leaf morphogenesis;GO:0030154//cell differentiation;GO:0045962//positive regulation of development, heterochronic;GO:0009793//embryo development ending in seed dormancy	GO:0003677//DNA binding	-
cme-miR319d	CL2098.Contig43_All	639	--	--	--	--	gi|57903597|gb|AY884226.1|	190	1e-45	Populus trichocarpa microRNA MIR142-1a gene, complete sequence	--	--	--	--	--	--	--	--	--	--	--	--	--	--	-	-	-
cme-miR319d	CL2098.Contig44_All	1771	gi|255557057|ref|XP_002519561.1|	55.8	1e-118	conserved hypothetical protein [Ricinus communis] >gi|223541258|gb|EEF42810.1| conserved hypothetical protein [Ricinus communis]	gi|259130060|gb|GQ505958.1|	204	2e-49	Citrus trifoliata cultivar Zhi TCP4 mRNA, complete cds	sp|Q8LPR5|TCP4_ARATH	298	5e-81	Transcription factor TCP4 OS=Arabidopsis thaliana GN=TCP4 PE=2 SV=1	--	--	--	--	--	K15168	8e-07	47	ath:AT1G25540	mediator of RNA polymerase II transcription subunit 25	-	-	-
cme-miR319d	CL2098.Contig45_All	1110	gi|325188645|emb|CCA23177.1|	254.2	2e-66	40S ribosomal protein S6 putative [Albugo laibachii Nc14]	gi|356555341|ref|XM_003545944.1|	67.9	2e-08	PREDICTED: Glycine max 40S ribosomal protein S6-like (LOC100800507), mRNA	sp|Q9M3V8|RS6_ASPOF	251	5e-67	40S ribosomal protein S6 OS=Asparagus officinalis GN=rps6 PE=2 SV=1	SPAC13G6.07c	258	1e-68	COG2125	Ribosomal protein S6E (S10)	K02991	1e-66	251	gmx:100800507	small subunit ribosomal protein S6e	-	-	GO:0030529//ribonucleoprotein complex
cme-miR319d	CL2098.Contig46_All	875	--	--	--	--	gi|396578531|gb|JX013999.1|	83.8	3e-13	Manihot esculenta precursor microRNA miR159a gene, complete sequence	--	--	--	--	--	--	--	--	--	--	--	--	--	--	-	-	-
cme-miR319d	CL2098.Contig47_All	488	gi|297740748|emb|CBI30930.3|	141.7	3e-33	unnamed protein product [Vitis vinifera]	gi|359483891|ref|XM_002271512.2|	81.8	6e-13	PREDICTED: Vitis vinifera transcription factor TCP2-like (LOC100249845), mRNA	sp|Q9C758|TCP24_ARATH	56.6	7e-09	Transcription factor TCP24 OS=Arabidopsis thaliana GN=TCP24 PE=1 SV=1	--	--	--	--	--	--	--	--	--	--	-	-	-
cme-miR319d	CL2098.Contig48_All	2008	gi|224125020|ref|XP_002329871.1|	835.9	0	predicted protein [Populus trichocarpa] >gi|222871108|gb|EEF08239.1| predicted protein [Populus trichocarpa]	gi|359474394|ref|XM_003631405.1|	196	6e-47	PREDICTED: Vitis vinifera oxysterol-binding protein-related protein 2A-like (LOC100252278), mRNA	sp|Q940Y1|ORP2A_ARATH	768	0	Oxysterol-binding protein-related protein 2A OS=Arabidopsis thaliana GN=ORP2A PE=2 SV=1	--	--	--	--	--	--	--	--	--	--	GO:0007165//signal transduction;GO:0008202//steroid metabolic process	GO:0035091//phosphatidylinositol binding;GO:0008142//oxysterol binding	-
cme-miR319d	CL2098.Contig49_All	1114	gi|224075906|ref|XP_002304822.1|	367.9	1e-100	predicted protein [Populus trichocarpa] >gi|222842254|gb|EEE79801.1| predicted protein [Populus trichocarpa]	gi|189163035|dbj|AP010269.1|	83.8	3e-13	Lotus japonicus genomic DNA, chromosome 3, clone: LjT33A07, TM0672, complete sequence	sp|Q0JIC2|GAM1_ORYSJ	122	4e-28	Transcription factor GAMYB OS=Oryza sativa subsp. japonica GN=GAM1 PE=2 SV=1	--	--	--	--	--	K09422	1e-101	367	pop:POPTR_555118	myb proto-oncogene protein, plant	-	-	-
cme-miR319d	CL2098.Contig50_All	927	gi|225443918|ref|XP_002271548.1|	274.2	1e-72	PREDICTED: transcription factor TCP2-like [Vitis vinifera]	gi|295841584|dbj|AB531019.1|	81.8	1e-12	Malus x domestica MdTCP2A mRNA, complete cds	sp|Q93V43|TCP2_ARATH	134	1e-31	Transcription factor TCP2 OS=Arabidopsis thaliana GN=TCP2 PE=2 SV=1	--	--	--	--	--	--	--	--	--	--	-	-	-
cme-miR319d	CL2098.Contig51_All	1156	gi|225426659|ref|XP_002281372.1|	199.9	5e-50	PREDICTED: zinc finger A20 and AN1 domain-containing stress-associated protein 1-like [Vitis vinifera]	gi|45430074|gb|AC136448.2|	60	5e-06	Oryza sativa Japonica Group chromosome 11 clone OSJNBb0077O14, complete sequence	sp|Q6NNI8|SAP1_ARATH	186	2e-47	Zinc finger A20 and AN1 domain-containing stress-associated protein 1 OS=Arabidopsis thaliana GN=SAP1 PE=1 SV=1	--	--	--	--	--	--	--	--	--	--	-	GO:0005515//protein binding	-
cme-miR319d	CL2098.Contig52_All	688	gi|224109582|ref|XP_002315243.1|	242.3	4e-63	predicted protein [Populus trichocarpa] >gi|222864283|gb|EEF01414.1| predicted protein [Populus trichocarpa]	gi|224109581|ref|XM_002315207.1|	73.8	2e-10	Populus trichocarpa predicted protein, mRNA	sp|Q6J163|5NG4_PINTA	110	7e-25	Auxin-induced protein 5NG4 OS=Pinus taeda PE=2 SV=1	--	--	--	--	--	--	--	--	--	--	-	-	GO:0016020//membrane
cme-miR319d	CL2098.Contig53_All	380	--	--	--	--	gi|359483827|ref|XM_002273730.2|	65.9	3e-08	PREDICTED: Vitis vinifera coatomer subunit zeta-1-like, transcript variant 1 (LOC100260697), mRNA	--	--	--	--	--	--	--	--	--	--	--	--	--	--	-	-	-
cme-miR319d	CL2098.Contig54_All	461	--	--	--	--	gi|396578531|gb|JX013999.1|	109	2e-21	Manihot esculenta precursor microRNA miR159a gene, complete sequence	--	--	--	--	--	--	--	--	--	--	--	--	--	--	-	-	-
vvi-miR319g	CL2098.Contig55_All	3569	gi|255540653|ref|XP_002511391.1|	1594.3	0	Pantothenate kinase, putative [Ricinus communis] >gi|223550506|gb|EEF51993.1| Pantothenate kinase, putative [Ricinus communis]	gi|225457016|ref|XM_002279043.1|	1469	0	PREDICTED: Vitis vinifera pantothenate kinase 2-like (LOC100255260), mRNA	sp|Q8L5Y9|PANK2_ARATH	1506	0	Pantothenate kinase 2 OS=Arabidopsis thaliana GN=At4g32180 PE=1 SV=2	SPBC4B4.01c	309	2e-83	COG5146	Pantothenate kinase, acetyl-CoA regulated	K09680	0	1594	rcu:RCOM_1510490	type II pantothenate kinase [EC:2.7.1.33]	GO:0015937//coenzyme A biosynthetic process;GO:0016310//phosphorylation	GO:0005515//protein binding;GO:0005524//ATP binding;GO:0004594//pantothenate kinase activity	-
vvi-miR319g	CL2098.Contig56_All	408	--	--	--	--	--	--	--	--	--	--	--	--	--	--	--	--	--	--	--	--	--	--	-	-	-
vvi-miR319g	CL2098.Contig57_All	488	gi|297740748|emb|CBI30930.3|	141.7	3e-33	unnamed protein product [Vitis vinifera]	gi|359483891|ref|XM_002271512.2|	81.8	6e-13	PREDICTED: Vitis vinifera transcription factor TCP2-like (LOC100249845), mRNA	sp|Q9C758|TCP24_ARATH	56.6	7e-09	Transcription factor TCP24 OS=Arabidopsis thaliana GN=TCP24 PE=1 SV=1	--	--	--	--	--	--	--	--	--	--	-	-	-
vvi-miR319g	CL2098.Contig58_All	2008	gi|224125020|ref|XP_002329871.1|	835.9	0	predicted protein [Populus trichocarpa] >gi|222871108|gb|EEF08239.1| predicted protein [Populus trichocarpa]	gi|359474394|ref|XM_003631405.1|	196	6e-47	PREDICTED: Vitis vinifera oxysterol-binding protein-related protein 2A-like (LOC100252278), mRNA	sp|Q940Y1|ORP2A_ARATH	768	0	Oxysterol-binding protein-related protein 2A OS=Arabidopsis thaliana GN=ORP2A PE=2 SV=1	--	--	--	--	--	--	--	--	--	--	GO:0007165//signal transduction;GO:0008202//steroid metabolic process	GO:0035091//phosphatidylinositol binding;GO:0008142//oxysterol binding	-
vvi-miR319g	CL2098.Contig59_All	1114	gi|224075906|ref|XP_002304822.1|	367.9	1e-100	predicted protein [Populus trichocarpa] >gi|222842254|gb|EEE79801.1| predicted protein [Populus trichocarpa]	gi|189163035|dbj|AP010269.1|	83.8	3e-13	Lotus japonicus genomic DNA, chromosome 3, clone: LjT33A07, TM0672, complete sequence	sp|Q0JIC2|GAM1_ORYSJ	122	4e-28	Transcription factor GAMYB OS=Oryza sativa subsp. japonica GN=GAM1 PE=2 SV=1	--	--	--	--	--	K09422	1e-101	367	pop:POPTR_555118	myb proto-oncogene protein, plant	-	-	-
vvi-miR319g	CL2098.Contig60_All	927	gi|225443918|ref|XP_002271548.1|	274.2	1e-72	PREDICTED: transcription factor TCP2-like [Vitis vinifera]	gi|295841584|dbj|AB531019.1|	81.8	1e-12	Malus x domestica MdTCP2A mRNA, complete cds	sp|Q93V43|TCP2_ARATH	134	1e-31	Transcription factor TCP2 OS=Arabidopsis thaliana GN=TCP2 PE=2 SV=1	--	--	--	--	--	--	--	--	--	--	-	-	-
vvi-miR319g	CL2098.Contig61_All	1156	gi|225426659|ref|XP_002281372.1|	199.9	5e-50	PREDICTED: zinc finger A20 and AN1 domain-containing stress-associated protein 1-like [Vitis vinifera]	gi|45430074|gb|AC136448.2|	60	5e-06	Oryza sativa Japonica Group chromosome 11 clone OSJNBb0077O14, complete sequence	sp|Q6NNI8|SAP1_ARATH	186	2e-47	Zinc finger A20 and AN1 domain-containing stress-associated protein 1 OS=Arabidopsis thaliana GN=SAP1 PE=1 SV=1	--	--	--	--	--	--	--	--	--	--	-	GO:0005515//protein binding	-
ath-miR319b	CL2098.Contig62_All	2008	gi|224125020|ref|XP_002329871.1|	835.9	0	predicted protein [Populus trichocarpa] >gi|222871108|gb|EEF08239.1| predicted protein [Populus trichocarpa]	gi|359474394|ref|XM_003631405.1|	196	6e-47	PREDICTED: Vitis vinifera oxysterol-binding protein-related protein 2A-like (LOC100252278), mRNA	sp|Q940Y1|ORP2A_ARATH	768	0	Oxysterol-binding protein-related protein 2A OS=Arabidopsis thaliana GN=ORP2A PE=2 SV=1	--	--	--	--	--	--	--	--	--	--	GO:0007165//signal transduction;GO:0008202//steroid metabolic process	GO:0035091//phosphatidylinositol binding;GO:0008142//oxysterol binding	-
ath-miR319b	CL2098.Contig63_All	1114	gi|224075906|ref|XP_002304822.1|	367.9	1e-100	predicted protein [Populus trichocarpa] >gi|222842254|gb|EEE79801.1| predicted protein [Populus trichocarpa]	gi|189163035|dbj|AP010269.1|	83.8	3e-13	Lotus japonicus genomic DNA, chromosome 3, clone: LjT33A07, TM0672, complete sequence	sp|Q0JIC2|GAM1_ORYSJ	122	4e-28	Transcription factor GAMYB OS=Oryza sativa subsp. japonica GN=GAM1 PE=2 SV=1	--	--	--	--	--	K09422	1e-101	367	pop:POPTR_555118	myb proto-oncogene protein, plant	-	-	-
ppt-miR390c-5p	CL2098.Contig64_All	1007	gi|255536745|ref|XP_002509439.1|	352.8	4e-96	conserved hypothetical protein [Ricinus communis] >gi|223549338|gb|EEF50826.1| conserved hypothetical protein [Ricinus communis]	gi|349721411|emb|FQ381862.1|	101	1e-18	Vitis vinifera clone SS0ABG81YE15	sp|Q6H6E6|DI194_ORYSJ	239	2e-63	Protein DEHYDRATION-INDUCED 19 homolog 4 OS=Oryza sativa subsp. japonica GN=DI19-4 PE=2 SV=1	--	--	--	--	--	--	--	--	--	--	-	GO:0008270//zinc ion binding	GO:0005739//mitochondrion
osa-miR396a-3p	CL2098.Contig65_All	766	--	--	--	--	gi|387763116|ref|NR_048896.1|	65.9	5e-08	Glycine max microRNA MIR396i (MIR396I), microRNA	--	--	--	--	--	--	--	--	--	--	--	--	--	--	-	-	-
osa-miR396a-3p	CL2098.Contig66_All	2163	gi|225457192|ref|XP_002283959.1|	941.8	0	PREDICTED: replication protein A 70 kDa DNA-binding subunit isoform 1 [Vitis vinifera]	gi|349720460|emb|FQ381707.1|	202	1e-48	Vitis vinifera clone SS0ABG87YO17	--	--	--	--	SPBC660.13c	281	2e-75	COG1599	Single-stranded DNA-binding replication protein A (RPA), large (70 kD) subunit and related ssDNA-binding proteins	K07466	0	941	vvi:100255412	replication factor A1	GO:0006260//DNA replication;GO:0010224//response to UV-B;GO:0006281//DNA repair	GO:0003677//DNA binding	GO:0005634//nucleus
osa-miR396a-3p	CL2098.Contig67_All	1710	gi|359489318|ref|XP_002269466.2|	851.3	0	PREDICTED: eukaryotic translation initiation factor 4G-like [Vitis vinifera]	gi|359489317|ref|XM_002269430.2|	505	1e-140	PREDICTED: Vitis vinifera eukaryotic translation initiation factor 4G-like (LOC100261523), mRNA	sp|Q76E23|IF4G1_ARATH	643	0	Eukaryotic translation initiation factor 4G OS=Arabidopsis thaliana GN=EIF4G PE=1 SV=2	--	--	--	--	--	K03260	0	851	vvi:100261523	translation initiation factor 4G	GO:0006413//translational initiation;GO:0009737//response to abscisic acid stimulus;GO:0016070//RNA metabolic process;GO:0009615//response to virus	GO:0003743//translation initiation factor activity	-
osa-miR396a-3p	CL2098.Contig68_All	2344	gi|255569375|ref|XP_002525655.1|	840.9	0	transcription factor, putative [Ricinus communis] >gi|223535091|gb|EEF36773.1| transcription factor, putative [Ricinus communis]	gi|302398724|gb|HM122518.1|	311	2e-81	Malus x domestica C3HL domain class transcription factor (C3HL7) mRNA, complete cds	sp|Q9LUZ4|C3H66_ARATH	595	3e-170	Zinc finger CCCH domain-containing protein 66 OS=Arabidopsis thaliana GN=At5g58620 PE=2 SV=1	--	--	--	--	--	K15172	1e-28	127	vcn:VOLCADRAFT_106802	transcription elongation factor SPT5	-	GO:0046872//metal ion binding	-
osa-miR396a-3p	CL2098.Contig69_All	595	--	--	--	--	gi|387762819|ref|NR_048595.1|	73.8	2e-10	Glycine max microRNA MIR396a (MIR396A), microRNA	--	--	--	--	--	--	--	--	--	--	--	--	--	--	-	-	-
osa-miR396a-3p	CL2098.Contig70_All	410	--	--	--	--	gi|396578649|gb|JX014117.1|	63.9	1e-07	Manihot esculenta precursor microRNA miR396b gene, complete sequence	--	--	--	--	--	--	--	--	--	--	--	--	--	--	-	-	-
rgl-miR5139	CL2098.Contig71_All	2081	gi|297830512|ref|XP_002883138.1|	131.3	0	hypothetical protein ARALYDRAFT_479356 [Arabidopsis lyrata subsp. lyrata] >gi|297328978|gb|EFH59397.1| hypothetical protein ARALYDRAFT_479356 [Arabidopsis lyrata subsp. lyrata]	gi|359490934|ref|XM_002274234.2|	492	1e-136	PREDICTED: Vitis vinifera histone deacetylase 15-like (LOC100268092), mRNA	sp|Q8GXJ1|HDA15_ARATH	562	0	Histone deacetylase 15 OS=Arabidopsis thaliana GN=HDA15 PE=2 SV=2	YNL021w	266	8e-71	COG0123	Deacetylases, including yeast histone deacetylase and acetoin utilization protein	K11407	0	600	gmx:100804724	histone deacetylase 6/10 [EC:3.5.1.98]	GO:0009294//DNA mediated transformation;GO:0016575//histone deacetylation	GO:0008270//zinc ion binding;GO:0004407//histone deacetylase activity	GO:0009536//plastid
rgl-miR5139	CL2098.Contig72_All	2155	gi|297830512|ref|XP_002883138.1|	131.3	0	hypothetical protein ARALYDRAFT_479356 [Arabidopsis lyrata subsp. lyrata] >gi|297328978|gb|EFH59397.1| hypothetical protein ARALYDRAFT_479356 [Arabidopsis lyrata subsp. lyrata]	gi|359490934|ref|XM_002274234.2|	492	1e-136	PREDICTED: Vitis vinifera histone deacetylase 15-like (LOC100268092), mRNA	sp|Q8GXJ1|HDA15_ARATH	562	0	Histone deacetylase 15 OS=Arabidopsis thaliana GN=HDA15 PE=2 SV=2	YNL021w	266	8e-71	COG0123	Deacetylases, including yeast histone deacetylase and acetoin utilization protein	K11407	0	600	gmx:100804724	histone deacetylase 6/10 [EC:3.5.1.98]	GO:0009294//DNA mediated transformation;GO:0016575//histone deacetylation	GO:0008270//zinc ion binding;GO:0004407//histone deacetylase activity	GO:0009536//plastid
rgl-miR5139	CL2098.Contig73_All	1857	gi|302143629|emb|CBI22382.3|	437.6	3e-121	unnamed protein product [Vitis vinifera]	gi|359488086|ref|XM_002266027.2|	97.6	4e-17	PREDICTED: Vitis vinifera probable lysine-specific demethylase JMJ14-like (LOC100243365), mRNA	sp|Q8GUI6|JMJ14_ARATH	161	1e-39	Probable lysine-specific demethylase JMJ14 OS=Arabidopsis thaliana GN=JMJ14 PE=1 SV=1	--	--	--	--	--	K14437	8e-10	63.9	cme:CMQ215C	chromodomain-helicase-DNA-binding protein 7 [EC:3.6.4.12]	-	GO:0003677//DNA binding	GO:0005634//nucleus
rgl-miR5139	CL2098.Contig74_All	1462	gi|357484411|ref|XP_003612493.1|	196.4	8e-49	LSM14-like protein [Medicago truncatula] >gi|355513828|gb|AES95451.1| LSM14-like protein [Medicago truncatula]	gi|332002898|gb|CP002688.1|	67.9	3e-08	Arabidopsis thaliana chromosome 5, complete sequence	sp|Q9C658|DCP5_ARATH	133	3e-31	Protein decapping 5 OS=Arabidopsis thaliana GN=DCP5 PE=1 SV=1	--	--	--	--	--	--	--	--	--	--	GO:0031087//deadenylation-independent decapping of nuclear-transcribed mRNA;GO:0017148//negative regulation of translation;GO:0033962//cytoplasmic mRNA processing body assembly	-	-
rgl-miR5139	CL2098.Contig75_All	661	gi|297736340|emb|CBI24978.3|	242.3	4e-63	unnamed protein product [Vitis vinifera]	--	--	--	--	sp|Q9SV01|FBW4_ARATH	188	2e-48	F-box/WD-40 repeat-containing protein At3g52030 OS=Arabidopsis thaliana GN=At3g52030 PE=2 SV=2	--	--	--	--	--	--	--	--	--	--	-	-	-
rgl-miR5139	CL2098.Contig76_All	514	--	--	--	--	gi|13429835|dbj|AB049134.1|	77.8	9e-12	Cucurbita moschata CmATS1;1 gene for acyl-(acyl-carrier-protein): glycerol-3-phosphate acyltransferase, complete cds	--	--	--	--	--	--	--	--	--	--	--	--	--	--	-	-	-
rgl-miR5139	CL2098.Contig77_All	2033	gi|356572468|ref|XP_003554390.1|	294.7	3e-78	PREDICTED: ABC transporter B family member 1-like isoform 2 [Glycine max]	gi|224140224|ref|XM_002323449.1|	670	0	Populus trichocarpa multidrug/pheromone exporter, MDR family, ABC transporter family, mRNA	sp|Q9ZR72|AB1B_ARATH	879	0	ABC transporter B family member 1 OS=Arabidopsis thaliana GN=ABCB1 PE=1 SV=1	SPCC663.03	330	7e-90	COG1132	ABC-type multidrug transport system, ATPase and permease components	K05658	0	941	gmx:100814667	ATP-binding cassette, subfamily B (MDR/TAP), member 1	GO:0009958//positive gravitropism;GO:0009624//response to nematode;GO:0043481//anthocyanin accumulation in tissues in response to UV light;GO:0009640//photomorphogenesis;GO:0008361//regulation of cell size;GO:0009637//response to blue light;GO:0010315//auxin efflux;GO:0009926//auxin polar transport;GO:0055085//transmembrane transport;GO:0006200//ATP catabolic process;GO:0048443//stamen development	GO:0015408;GO:0010329//auxin efflux transmembrane transporter activity;GO:0008559//xenobiotic-transporting ATPase activity;GO:0005516//calmodulin binding;GO:0005524//ATP binding	GO:0016021//integral to membrane;GO:0005886//plasma membrane
rgl-miR5139	CL2098.Contig78_All	2216	gi|357440803|ref|XP_003590679.1|	321.6	3e-86	hypothetical protein MTR_1g072560 [Medicago truncatula] >gi|355479727|gb|AES60930.1| hypothetical protein MTR_1g072560 [Medicago truncatula]	gi|359479801|ref|XM_002276472.2|	125	2e-25	PREDICTED: Vitis vinifera uncharacterized LOC100264786 (LOC100264786), mRNA	--	--	--	--	--	--	--	--	--	--	--	--	--	--	-	-	-
rgl-miR5139	CL2098.Contig79_All	1272	gi|225435142|ref|XP_002284629.1|	337	3e-91	PREDICTED: uncharacterized protein LOC100250176 [Vitis vinifera]	gi|356558400|ref|XM_003547447.1|	266	5e-68	PREDICTED: Glycine max uncharacterized protein LOC100818129, transcript variant 2 (LOC100818129), mRNA	--	--	--	--	--	--	--	--	--	K11671	3e-60	230	ppp:PHYPADRAFT_164383	nuclear factor related to kappa-B-binding protein	-	GO:0003677//DNA binding	-
rgl-miR5139	CL2098.Contig80_All	2601	gi|225460813|ref|XP_002276851.1|	1124	0	PREDICTED: fimbrin-like protein 2-like [Vitis vinifera]	gi|225460812|ref|XM_002276815.1|	660	0	PREDICTED: Vitis vinifera fimbrin-like protein 2-like (LOC100248725), mRNA	sp|Q7G188|FIMB1_ARATH	978	0	Fimbrin-1 OS=Arabidopsis thaliana GN=FIM1 PE=1 SV=2	SPBC1778.06c	443	8e-124	COG5069	Ca2+-binding actin-bundling protein fimbrin/plastin (EF-Hand superfamily)	--	--	--	--	--	-	GO:0003779//actin binding;GO:0005509//calcium ion binding	-
rgl-miR5139	CL2098.Contig81_All	2656	gi|255585468|ref|XP_002533427.1|	915.6	0	ATP binding protein, putative [Ricinus communis] >gi|223526727|gb|EEF28958.1| ATP binding protein, putative [Ricinus communis]	gi|359491529|ref|XM_002279091.2|	394	1e-106	PREDICTED: Vitis vinifera probable inactive receptor kinase At1g48480-like (LOC100243943), mRNA	sp|Q9LP77|Y1848_ARATH	798	0	Probable inactive receptor kinase At1g48480 OS=Arabidopsis thaliana GN=RKL1 PE=1 SV=1	YAR019c	80.9	1e-14	COG0515	Serine/threonine protein kinase	K10576	2e-80	298	vvi:100250088	ubiquitin-conjugating enzyme E2 H [EC:6.3.2.19]	GO:0006468//protein phosphorylation;GO:0007169//transmembrane receptor protein tyrosine kinase signaling pathway	GO:0004674//protein serine/threonine kinase activity;GO:0016491//oxidoreductase activity;GO:0005524//ATP binding;GO:0005515//protein binding;GO:0050321//tau-protein kinase activity	GO:0016021//integral to membrane;GO:0005774//vacuolar membrane;GO:0005886//plasma membrane
rgl-miR5139	CL2098.Contig82_All	2567	gi|356550161|ref|XP_003543457.1|	1325.1	0	PREDICTED: 4-hydroxy-3-methylbut-2-en-1-yl diphosphate synthase-like [Glycine max]	gi|356543459|ref|XM_003540130.1|	1316	0	PREDICTED: Glycine max 4-hydroxy-3-methylbut-2-en-1-yl diphosphate synthase-like (LOC100819481), mRNA	sp|F4K0E8|ISPG_ARATH	1267	0	4-hydroxy-3-methylbut-2-en-1-yl diphosphate synthase, chloroplastic OS=Arabidopsis thaliana GN=ISPG PE=1 SV=1	CT057	318	4e-86	COG0821	Enzyme involved in the deoxyxylulose pathway of isoprenoid biosynthesis	K03526	0	1325	gmx:100801743	(E)-4-hydroxy-3-methylbut-2-enyl-diphosphate synthase [EC:1.17.7.1]	GO:0055114//oxidation-reduction process;GO:0009862//systemic acquired resistance, salicylic acid mediated signaling pathway;GO:0019288//isopentenyl diphosphate biosynthetic process, mevalonate-independent pathway;GO:0009617//response to bacterium;GO:0016114//terpenoid biosynthetic process	GO:0051539//4 iron, 4 sulfur cluster binding;GO:0046429//4-hydroxy-3-methylbut-2-en-1-yl diphosphate synthase activity;GO:0005506//iron ion binding	GO:0009941//chloroplast envelope;GO:0009570//chloroplast stroma
rgl-miR5139	CL2098.Contig83_All	4345	gi|255551623|ref|XP_002516857.1|	138.7	7e-31	conserved hypothetical protein [Ricinus communis] >gi|223543945|gb|EEF45471.1| conserved hypothetical protein [Ricinus communis]	--	--	--	--	--	--	--	--	--	--	--	--	--	--	--	--	--	--	-	-	GO:0044464//cell part
rgl-miR5139	CL2098.Contig84_All	847	gi|297734347|emb|CBI15594.3|	228	1e-58	unnamed protein product [Vitis vinifera]	gi|160949609|emb|CU228973.1|	113	3e-22	Populus EST from severe drought-stressed leaves	--	--	--	--	--	--	--	--	--	--	--	--	--	--	-	-	GO:0009535//chloroplast thylakoid membrane
rgl-miR5139	CL2098.Contig85_All	997	gi|297734347|emb|CBI15594.3|	229.2	7e-59	unnamed protein product [Vitis vinifera]	gi|160949609|emb|CU228973.1|	113	3e-22	Populus EST from severe drought-stressed leaves	--	--	--	--	--	--	--	--	--	--	--	--	--	--	-	-	GO:0009535//chloroplast thylakoid membrane
rgl-miR5139	CL2098.Contig86_All	1297	gi|225450263|ref|XP_002266897.1|	743.4	0	PREDICTED: beta-hexosaminidase-like [Vitis vinifera]	gi|356528620|ref|XM_003532850.1|	101	2e-18	PREDICTED: Glycine max beta-hexosaminidase-like (LOC100786953), mRNA	--	--	--	--	SMb21160	150	4e-36	COG3525	N-acetyl-beta-hexosaminidase	K12373	0	743	vvi:100240836	hexosaminidase [EC:3.2.1.52]	GO:0005975//carbohydrate metabolic process	GO:0004563//beta-N-acetylhexosaminidase activity;GO:0043169//cation binding;GO:0035251//UDP-glucosyltransferase activity	GO:0016023//cytoplasmic membrane-bounded vesicle;GO:0005886//plasma membrane
rgl-miR5139	CL2098.Contig87_All	561	--	--	--	--	--	--	--	--	--	--	--	--	--	--	--	--	--	--	--	--	--	--	-	-	-
rgl-miR5139	CL2098.Contig88_All	541	gi|356504880|ref|XP_003521222.1|	65.1	5e-10	PREDICTED: LOW QUALITY PROTEIN: activator of 90 kDa heat shock protein ATPase homolog 1-like [Glycine max]	gi|147844753|emb|AM426203.2|	60	2e-06	Vitis vinifera contig VV78X083356.4, whole genome shotgun sequence	--	--	--	--	--	--	--	--	--	--	--	--	--	--	-	-	-
rgl-miR5139	CL2098.Contig89_All	264	--	--	--	--	--	--	--	--	--	--	--	--	--	--	--	--	--	--	--	--	--	--	-	-	-
rgl-miR5139	CL2098.Contig90_All	257	--	--	--	--	--	--	--	--	--	--	--	--	--	--	--	--	--	--	--	--	--	--	-	-	-
rgl-miR5139	CL2098.Contig91_All	684	gi|384248368|gb|EIE21852.1|	52.8	4e-06	NAD(P)-binding protein [Coccomyxa subellipsoidea C-169]	--	--	--	--	--	--	--	--	FN1433	54.3	2e-07	COG4221	Short-chain alcohol dehydrogenase of unknown specificity	K10251	2e-06	50.4	ath:AT1G67730	beta-keto reductase [EC:1.1.1.-]	-	-	-
novel_mir_35	CL2098.Contig92_All	402	--	--	--	--	gi|396578522|gb|JX013990.1|	95.6	3e-17	Manihot esculenta precursor microRNA miR156e gene, complete sequence	--	--	--	--	--	--	--	--	--	--	--	--	--	--	-	-	-
novel_mir_42	CL2098.Contig93_All	410	--	--	--	--	gi|396578649|gb|JX014117.1|	63.9	1e-07	Manihot esculenta precursor microRNA miR396b gene, complete sequence	--	--	--	--	--	--	--	--	--	--	--	--	--	--	-	-	-
novel_mir_42	CL2098.Contig94_All	362	gi|390135785|gb|AFL56849.1|	29.3	8e-12	protein phosphatase 2C [Cucumis sativus]	gi|390135784|gb|JQ793946.1|	87.7	7e-15	Cucumis sativus protein phosphatase 2C (ABI2) gene, complete cds	sp|Q9SMZ9|Y4331_ARATH	52	7e-09	Uncharacterized protein At4g33100 OS=Arabidopsis thaliana GN=At4g33100 PE=2 SV=1	--	--	--	--	--	--	--	--	--	--	-	-	-
novel_mir_74	CL2098.Contig95_All	1275	gi|225452871|ref|XP_002283811.1|	317	3e-85	PREDICTED: NAC domain-containing protein 100-like [Vitis vinifera]	gi|356512033|ref|XM_003524678.1|	163	5e-37	PREDICTED: Glycine max NAC domain-containing protein 100-like (LOC100798002), mRNA	sp|Q9FLJ2|NC100_ARATH	296	2e-80	NAC domain-containing protein 100 OS=Arabidopsis thaliana GN=NAC100 PE=2 SV=1	--	--	--	--	--	--	--	--	--	--	-	-	-
novel_mir_74	CL2098.Contig96_All	774	gi|255647843|gb|ACU24381.1|	251.5	9e-66	unknown [Glycine max]	gi|357451392|ref|XM_003595925.1|	85.7	6e-14	Medicago truncatula NAC domain protein (MTR_2g064470) mRNA, complete cds	sp|Q84TE6|NAC22_ARATH	189	1e-48	NAC domain-containing protein 21/22 OS=Arabidopsis thaliana GN=NAC021 PE=1 SV=2	--	--	--	--	--	--	--	--	--	--	GO:0010072//primary shoot apical meristem specification;GO:0048527//lateral root development;GO:0006351//transcription, DNA-dependent;GO:0009734//auxin mediated signaling pathway	GO:0003700//sequence-specific DNA binding transcription factor activity	-
novel_mir_74	CL2098.Contig97_All	1154	gi|255647843|gb|ACU24381.1|	417.2	2e-115	unknown [Glycine max]	gi|34558776|gb|AY308828.1|	131	2e-27	Capsicum annuum salicylic acid-induced protein 19 gene, complete cds	sp|Q84TE6|NAC22_ARATH	331	5e-91	NAC domain-containing protein 21/22 OS=Arabidopsis thaliana GN=NAC021 PE=1 SV=2	--	--	--	--	--	--	--	--	--	--	GO:0010072//primary shoot apical meristem specification;GO:0048527//lateral root development;GO:0006351//transcription, DNA-dependent;GO:0009734//auxin mediated signaling pathway	GO:0003700//sequence-specific DNA binding transcription factor activity	-
novel_mir_74	CL2098.Contig98_All	1119	gi|255647843|gb|ACU24381.1|	416	4e-115	unknown [Glycine max]	gi|34558776|gb|AY308828.1|	109	6e-21	Capsicum annuum salicylic acid-induced protein 19 gene, complete cds	sp|Q84TE6|NAC22_ARATH	330	1e-90	NAC domain-containing protein 21/22 OS=Arabidopsis thaliana GN=NAC021 PE=1 SV=2	--	--	--	--	--	--	--	--	--	--	GO:0010072//primary shoot apical meristem specification;GO:0048527//lateral root development;GO:0006351//transcription, DNA-dependent;GO:0009734//auxin mediated signaling pathway	GO:0003700//sequence-specific DNA binding transcription factor activity	-
novel_mir_74	CL2098.Contig99_All	390	--	--	--	--	--	--	--	--	--	--	--	--	--	--	--	--	--	--	--	--	--	--	-	-	-
novel_mir_74	CL2098.Contig100_All	4293	gi|359475856|ref|XP_003631763.1|	1884.4	0	PREDICTED: trafficking protein particle complex subunit 9-like isoform 2 [Vitis vinifera]	gi|359475855|ref|XM_003631715.1|	938	0	PREDICTED: Vitis vinifera trafficking protein particle complex subunit 9-like, transcript variant 2 (LOC100259475), mRNA	--	--	--	--	--	--	--	--	--	--	--	--	--	--	GO:0000910//cytokinesis	-	-
novel_mir_74	CL2098.Contig101_All	1134	gi|255547357|ref|XP_002514736.1|	392.9	4e-108	NAC domain-containing protein 21/22, putative [Ricinus communis] >gi|223546340|gb|EEF47842.1| NAC domain-containing protein 21/22, putative [Ricinus communis]	gi|225452870|ref|XM_002283775.1|	167	3e-38	PREDICTED: Vitis vinifera NAC domain-containing protein 100-like (LOC100250998), mRNA	sp|Q9FLJ2|NC100_ARATH	360	1e-99	NAC domain-containing protein 100 OS=Arabidopsis thaliana GN=NAC100 PE=2 SV=1	--	--	--	--	--	--	--	--	--	--	GO:0007275//multicellular organismal development	GO:0003700//sequence-specific DNA binding transcription factor activity	-
novel_mir_101	CL2098.Contig102_All	265	--	--	--	--	--	--	--	--	--	--	--	--	--	--	--	--	--	--	--	--	--	--	-	-	-
novel_mir_101	CL2098.Contig103_All	704	gi|226506414|ref|NP_001141375.1|	53.1	3e-06	uncharacterized protein LOC100273466 [Zea mays] >gi|195631109|gb|ACG36655.1| pathogen induced protein 2-4 [Zea mays]	--	--	--	--	--	--	--	--	--	--	--	--	--	--	--	--	--	--	-	-	-
novel_mir_101	CL2098.Contig104_All	1547	gi|255581178|ref|XP_002531402.1|	343.2	6e-93	N-acetyltransferase, putative [Ricinus communis] >gi|223528995|gb|EEF30986.1| N-acetyltransferase, putative [Ricinus communis]	gi|356497784|ref|XM_003517690.1|	79.8	7e-12	PREDICTED: Glycine max uncharacterized protein LOC100817255 (LOC100817255), mRNA	--	--	--	--	--	--	--	--	--	--	--	--	--	--	GO:0008152//metabolic process	GO:0008080//N-acetyltransferase activity	GO:0009507//chloroplast
novel_mir_101	CL2098.Contig105_All	413	--	--	--	--	gi|167493|gb|M61195.1|CUCACC1	67.9	7e-09	Zucchini 1-aminocyclopropane-1-carboxylate synthase (CP-ACC1A and CP-ACC1B) genes, complete cds	--	--	--	--	--	--	--	--	--	--	--	--	--	--	-	-	-
novel_mir_101	CL2098.Contig106_All	502	--	--	--	--	gi|167493|gb|M61195.1|CUCACC1	67.9	9e-09	Zucchini 1-aminocyclopropane-1-carboxylate synthase (CP-ACC1A and CP-ACC1B) genes, complete cds	--	--	--	--	--	--	--	--	--	--	--	--	--	--	-	-	-
novel_mir_101	CL2098.Contig107_All	1681	gi|359489656|ref|XP_003633958.1|	618.6	8e-176	PREDICTED: probable polygalacturonase-like [Vitis vinifera]	gi|356560735|ref|XM_003548596.1|	208	1e-50	PREDICTED: Glycine max probable polygalacturonase-like (LOC100778404), mRNA	sp|A7PZL3|PGLR_VITVI	618	3e-177	Probable polygalacturonase OS=Vitis vinifera GN=GSVIVT00026920001 PE=1 SV=1	TM0437	138	3e-32	COG5434	Endopolygalacturonase	K01184	5e-21	100	ath:AT5G17200	polygalacturonase [EC:3.2.1.15]	GO:0005975//carbohydrate metabolic process;GO:0007047//cellular cell wall organization	GO:0004650//polygalacturonase activity	-
novel_mir_101	CL2098.Contig108_All	1996	gi|359489656|ref|XP_003633958.1|	224.6	0	PREDICTED: probable polygalacturonase-like [Vitis vinifera]	gi|356560735|ref|XM_003548596.1|	208	2e-50	PREDICTED: Glycine max probable polygalacturonase-like (LOC100778404), mRNA	sp|A7PZL3|PGLR_VITVI	554	0	Probable polygalacturonase OS=Vitis vinifera GN=GSVIVT00026920001 PE=1 SV=1	CAC0355	119	3e-36	COG5434	Endopolygalacturonase	K01184	2e-18	92.4	aly:ARALYDRAFT_326150	polygalacturonase [EC:3.2.1.15]	GO:0005975//carbohydrate metabolic process;GO:0007047//cellular cell wall organization	GO:0004650//polygalacturonase activity	-
novel_mir_101	CL2098.Contig109_All	764	--	--	--	--	--	--	--	--	--	--	--	--	--	--	--	--	--	--	--	--	--	--	-	-	-
novel_mir_101	CL2098.Contig110_All	666	gi|255557717|ref|XP_002519888.1|	132.5	4e-30	conserved hypothetical protein [Ricinus communis] >gi|223540934|gb|EEF42492.1| conserved hypothetical protein [Ricinus communis]	gi|356496462|ref|XM_003517039.1|	133	2e-28	PREDICTED: Glycine max uncharacterized protein LOC100500226 (LOC100500226), mRNA	--	--	--	--	--	--	--	--	--	--	--	--	--	--	-	GO:0008270//zinc ion binding	GO:0005622//intracellular
novel_mir_101	CL2098.Contig111_All	1611	gi|224131572|ref|XP_002321120.1|	369.4	8e-101	predicted protein [Populus trichocarpa] >gi|222861893|gb|EEE99435.1| predicted protein [Populus trichocarpa]	gi|356569102|ref|XM_003552697.1|	232	9e-58	PREDICTED: Glycine max solute carrier family 35 member F1-like (LOC100817482), mRNA	--	--	--	--	SPCC320.08	145	2e-34	COG0697	Permeases of the drug/metabolite transporter (DMT) superfamily	K15287	8e-102	369	pop:POPTR_896170	solute carrier family 35, member F1/2	-	-	GO:0005739//mitochondrion;GO:0016020//membrane
novel_mir_101	CL2098.Contig112_All	277	--	--	--	--	--	--	--	--	--	--	--	--	--	--	--	--	--	--	--	--	--	--	-	-	-
novel_mir_101	CL2098.Contig113_All	250	--	--	--	--	--	--	--	--	--	--	--	--	--	--	--	--	--	--	--	--	--	--	-	-	-
novel_mir_101	CL2098.Contig114_All	2905	gi|359492647|ref|XP_002281968.2|	889	0	PREDICTED: proline-rich receptor-like protein kinase PERK13-like [Vitis vinifera] >gi|302142409|emb|CBI19612.3| unnamed protein product [Vitis vinifera]	gi|357438036|ref|XM_003589246.1|	93.7	9e-16	Medicago truncatula Cysteine-rich receptor-like protein kinase (MTR_1g021570) mRNA, complete cds	sp|P0DH62|Y4407_SELML	318	1e-86	Inactive protein kinase SELMODRAFT_444075 OS=Selaginella moellendorffii GN=SELMODRAFT_444075 PE=2 SV=1	Cgl2127_1	95.5	5e-19	COG0515	Serine/threonine protein kinase	K04733	1e-68	260	smo:SELMODRAFT_159261	interleukin-1 receptor-associated kinase 4 [EC:2.7.11.1]	-	GO:0004713//protein tyrosine kinase activity	-
novel_mir_101	CL2098.Contig115_All	1016	gi|255538502|ref|XP_002510316.1|	330.1	3e-89	BRASSINOSTEROID INSENSITIVE 1-associated receptor kinase 1 precursor, putative [Ricinus communis] >gi|223551017|gb|EEF52503.1| BRASSINOSTEROID INSENSITIVE 1-associated receptor kinase 1 precursor, putative [Ricinus communis]	gi|357438036|ref|XM_003589246.1|	93.7	3e-16	Medicago truncatula Cysteine-rich receptor-like protein kinase (MTR_1g021570) mRNA, complete cds	sp|Q9XI96|PERK7_ARATH	145	3e-35	Proline-rich receptor-like protein kinase PERK7 OS=Arabidopsis thaliana GN=PERK7 PE=2 SV=1	lin1934_1	77.8	3e-14	COG0515	Serine/threonine protein kinase	K04733	3e-37	154	smo:SELMODRAFT_159261	interleukin-1 receptor-associated kinase 4 [EC:2.7.11.1]	GO:0006468//protein phosphorylation	GO:0004872//receptor activity;GO:0004715//non-membrane spanning protein tyrosine kinase activity;GO:0005524//ATP binding	-
novel_mir_101	CL2098.Contig116_All	419	--	--	--	--	--	--	--	--	--	--	--	--	--	--	--	--	--	--	--	--	--	--	-	-	-
novel_mir_101	CL2098.Contig117_All	1272	gi|225435142|ref|XP_002284629.1|	337	3e-91	PREDICTED: uncharacterized protein LOC100250176 [Vitis vinifera]	gi|356558400|ref|XM_003547447.1|	266	5e-68	PREDICTED: Glycine max uncharacterized protein LOC100818129, transcript variant 2 (LOC100818129), mRNA	--	--	--	--	--	--	--	--	--	K11671	3e-60	230	ppp:PHYPADRAFT_164383	nuclear factor related to kappa-B-binding protein	-	GO:0003677//DNA binding	-
novel_mir_101	CL2098.Contig118_All	1086	gi|255581256|ref|XP_002531440.1|	348.2	1e-94	Protein kinase APK1A, chloroplast precursor, putative [Ricinus communis] >gi|223528959|gb|EEF30952.1| Protein kinase APK1A, chloroplast precursor, putative [Ricinus communis]	gi|13429835|dbj|AB049134.1|	85.7	8e-14	Cucurbita moschata CmATS1;1 gene for acyl-(acyl-carrier-protein): glycerol-3-phosphate acyltransferase, complete cds	sp|Q06548|APK1A_ARATH	313	8e-86	Protein kinase APK1A, chloroplastic OS=Arabidopsis thaliana GN=APK1A PE=2 SV=1	CAC0404_1	75.9	1e-13	COG0515	Serine/threonine protein kinase	K00924	3e-84	310	osa:4337593	[EC:2.7.1.-]	GO:0002213//defense response to insect;GO:0050832//defense response to fungus;GO:0006468//protein phosphorylation	GO:0005524//ATP binding;GO:0004674//protein serine/threonine kinase activity	GO:0005886//plasma membrane;GO:0009536//plastid
novel_mir_101	CL2098.Contig119_All	458	--	--	--	--	gi|13429835|dbj|AB049134.1|	63.9	1e-07	Cucurbita moschata CmATS1;1 gene for acyl-(acyl-carrier-protein): glycerol-3-phosphate acyltransferase, complete cds	--	--	--	--	--	--	--	--	--	--	--	--	--	--	-	-	-
novel_mir_101	CL2098.Contig120_All	496	--	--	--	--	gi|13429835|dbj|AB049134.1|	77.8	9e-12	Cucurbita moschata CmATS1;1 gene for acyl-(acyl-carrier-protein): glycerol-3-phosphate acyltransferase, complete cds	--	--	--	--	--	--	--	--	--	--	--	--	--	--	-	-	-
novel_mir_101	CL2098.Contig121_All	253	--	--	--	--	gi|13429835|dbj|AB049134.1|	69.9	1e-09	Cucurbita moschata CmATS1;1 gene for acyl-(acyl-carrier-protein): glycerol-3-phosphate acyltransferase, complete cds	--	--	--	--	--	--	--	--	--	--	--	--	--	--	-	-	-
novel_mir_101	CL2098.Contig122_All	333	--	--	--	--	gi|13429835|dbj|AB049134.1|	58	6e-06	Cucurbita moschata CmATS1;1 gene for acyl-(acyl-carrier-protein): glycerol-3-phosphate acyltransferase, complete cds	--	--	--	--	--	--	--	--	--	--	--	--	--	--	-	-	-
novel_mir_101	CL2098.Contig123_All	1302	gi|296082849|emb|CBI22150.3|	208	2e-52	unnamed protein product [Vitis vinifera]	--	--	--	--	sp|Q9ZNQ8|PERK4_ARATH	101	8e-22	Proline-rich receptor-like protein kinase PERK4 OS=Arabidopsis thaliana GN=PERK4 PE=1 SV=1	BS_yloP_1	60.1	8e-09	COG0515	Serine/threonine protein kinase	K13416	2e-20	98.6	ath:AT4G33430	brassinosteroid insensitive 1-associated receptor kinase 1 [EC:2.7.10.1 2.7.11.1]	GO:0006468//protein phosphorylation;GO:0055114//oxidation-reduction process	GO:0004872//receptor activity;GO:0004672//protein kinase activity;GO:0005524//ATP binding;GO:0032440//2-alkenal reductase [NAD(P)] activity	GO:0016021//integral to membrane
novel_mir_101	CL2098.Contig124_All	3033	gi|255537079|ref|XP_002509606.1|	799.7	0	leucine rich repeat receptor kinase, putative [Ricinus communis] >gi|223549505|gb|EEF50993.1| leucine rich repeat receptor kinase, putative [Ricinus communis]	gi|356565314|ref|XM_003550839.1|	65.9	2e-07	PREDICTED: Glycine max probable LRR receptor-like serine/threonine-protein kinase At1g34110-like (LOC100784155), mRNA	sp|Q9SCT4|IMK2_ARATH	258	1e-68	Probably inactive leucine-rich repeat receptor-like protein kinase IMK2 OS=Arabidopsis thaliana GN=IMK2 PE=1 SV=1	BS_yloP_1	76.3	3e-13	COG0515	Serine/threonine protein kinase	K13418	1e-61	236	vvi:100247683	somatic embryogenesis receptor kinase 1 [EC:2.7.10.1 2.7.11.1]	GO:0006468//protein phosphorylation;GO:0007169//transmembrane receptor protein tyrosine kinase signaling pathway	GO:0016491//oxidoreductase activity;GO:0005524//ATP binding;GO:0004674//protein serine/threonine kinase activity	GO:0005886//plasma membrane
novel_mir_101	CL2098.Contig125_All	1795	gi|359494840|ref|XP_003634851.1|	577.8	1e-163	PREDICTED: pentatricopeptide repeat-containing protein At1g61870, mitochondrial-like [Vitis vinifera]	gi|123671853|emb|AM426541.1|	69.9	8e-09	Vitis vinifera contig VV78X275378.15, whole genome shotgun sequence	sp|Q8LE47|PPR87_ARATH	506	1e-143	Pentatricopeptide repeat-containing protein At1g61870, mitochondrial OS=Arabidopsis thaliana GN=PPR336 PE=2 SV=2	--	--	--	--	--	K15336	4e-23	108	vvi:100259391	tRNA (cytosine38-C5)-methyltransferase [EC:2.1.1.204]	GO:0006355//regulation of transcription, DNA-dependent	GO:0003700//sequence-specific DNA binding transcription factor activity	GO:0016020//membrane;GO:0005739//mitochondrion
novel_mir_101	CL2098.Contig126_All	1712	gi|359494840|ref|XP_003634851.1|	577.8	1e-163	PREDICTED: pentatricopeptide repeat-containing protein At1g61870, mitochondrial-like [Vitis vinifera]	gi|123671853|emb|AM426541.1|	69.9	8e-09	Vitis vinifera contig VV78X275378.15, whole genome shotgun sequence	sp|Q8LE47|PPR87_ARATH	506	1e-143	Pentatricopeptide repeat-containing protein At1g61870, mitochondrial OS=Arabidopsis thaliana GN=PPR336 PE=2 SV=2	--	--	--	--	--	K15336	3e-23	108	vvi:100259391	tRNA (cytosine38-C5)-methyltransferase [EC:2.1.1.204]	GO:0006355//regulation of transcription, DNA-dependent	GO:0003700//sequence-specific DNA binding transcription factor activity	GO:0016020//membrane;GO:0005739//mitochondrion
novel_mir_101	CL2098.Contig127_All	1022	gi|356567947|ref|XP_003552176.1|	38.5	2e-90	PREDICTED: uncharacterized protein LOC100776331 [Glycine max]	gi|225431450|ref|XM_002274134.1|	155	1e-34	PREDICTED: Vitis vinifera uncharacterized LOC100247174 (LOC100247174), mRNA	--	--	--	--	--	--	--	--	--	--	--	--	--	--	-	GO:0008270//zinc ion binding	-
novel_mir_101	CL2098.Contig128_All	1323	gi|307136137|gb|ADN33982.1|	518.9	6e-146	NADH:cytochrome b5 reductase [Cucumis melo subsp. melo]	gi|55979114|gb|AY819699.1|	327	2e-86	Vernicia fordii NADH:cytochrome b5 reductase (CBR1A) mRNA, complete cds	sp|Q9ZNT1|NB5R1_ARATH	450	1e-126	NADH--cytochrome b5 reductase 1 OS=Arabidopsis thaliana GN=CBR1 PE=1 SV=1	SPCC970.03	235	1e-61	COG0543	2-polyprenylphenol hydroxylase and related flavodoxin oxidoreductases	K00326	6e-129	459	gmx:100805390	cytochrome-b5 reductase [EC:1.6.2.2]	GO:0022900//electron transport chain	GO:0004128//cytochrome-b5 reductase activity	GO:0009505//plant-type cell wall;GO:0016023//cytoplasmic membrane-bounded vesicle;GO:0005886//plasma membrane;GO:0005783//endoplasmic reticulum
novel_mir_101	CL2098.Contig129_All	398	--	--	--	--	gi|17154770|gb|AF104391.1|AF104391	65.9	3e-08	Cucumis sativus ubiquitin-like protein (UBI-1) mRNA, complete cds	--	--	--	--	--	--	--	--	--	--	--	--	--	--	-	-	-
novel_mir_101	CL2098.Contig130_All	346	--	--	--	--	--	--	--	--	--	--	--	--	--	--	--	--	--	--	--	--	--	--	-	-	-
novel_mir_101	CL2098.Contig131_All	843	gi|224127782|ref|XP_002329176.1|	218	1e-55	predicted protein [Populus trichocarpa] >gi|222870957|gb|EEF08088.1| predicted protein [Populus trichocarpa]	--	--	--	--	--	--	--	--	all0283_3	59.3	8e-09	COG2319	FOG: WD40 repeat	K03070	1e-52	204	gmx:100793437	preprotein translocase subunit SecA	GO:0017038//protein import;GO:0006605//protein targeting;GO:0065002//intracellular protein transmembrane transport;GO:0009790//embryo development	GO:0008270//zinc ion binding;GO:0005524//ATP binding;GO:0016740//transferase activity	GO:0009536//plastid;GO:0016020//membrane
novel_mir_101	CL2098.Contig132_All	1247	gi|359485584|ref|XP_002274829.2|	261.5	1e-68	PREDICTED: transcription factor ILR3-like [Vitis vinifera]	gi|349730608|emb|FQ389016.1|	109	7e-21	Vitis vinifera clone SS0AEB21YC03	sp|Q9FH37|ILR3_ARATH	231	7e-61	Transcription factor ILR3 OS=Arabidopsis thaliana GN=ILR3 PE=1 SV=1	--	--	--	--	--	K13422	3e-06	51.2	mtr:MTR_8g067280	transcription factor MYC2	-	-	GO:0005634//nucleus
novel_mir_101	CL2098.Contig133_All	869	--	--	--	--	--	--	--	--	--	--	--	--	--	--	--	--	--	--	--	--	--	--	-	-	-
novel_mir_101	CL2098.Contig134_All	687	gi|225437308|ref|XP_002267192.1|	288.1	7e-77	PREDICTED: dol-P-Man:Man(5)GlcNAc(2)-PP-Dol alpha-1,3-mannosyltransferase [Vitis vinifera] >gi|297743859|emb|CBI36829.3| unnamed protein product [Vitis vinifera]	gi|225437307|ref|XM_002267156.1|	163	3e-37	PREDICTED: Vitis vinifera dol-P-Man:Man(5)GlcNAc(2)-PP-Dol alpha-1,3-mannosyltransferase-like (LOC100253790), mRNA	sp|O82244|ALG3_ARATH	246	7e-66	Dol-P-Man:Man(5)GlcNAc(2)-PP-Dol alpha-1,3-mannosyltransferase OS=Arabidopsis thaliana GN=ALG3 PE=1 SV=1	--	--	--	--	--	K03845	7e-78	288	vvi:100253790	alpha-1,3-mannosyltransferase [EC:2.4.1.258]	GO:0006486//protein glycosylation	GO:0000033//alpha-1,3-mannosyltransferase activity	GO:0016023//cytoplasmic membrane-bounded vesicle;GO:0016021//integral to membrane;GO:0005783//endoplasmic reticulum
novel_mir_101	CL2098.Contig135_All	581	gi|134252250|gb|ABO64857.1|	203.8	1e-51	methionine-R-sulfoxide reductase B4 protein [Capsicum annuum]	gi|224114857|ref|XM_002316839.1|	224	7e-56	Populus trichocarpa methionine sulfoxide reductase type (PtrMsrB2), mRNA	sp|Q0DC89|MSRB1_ORYSJ	191	2e-49	Peptide methionine sulfoxide reductase B1, chloroplastic OS=Oryza sativa subsp. japonica GN=MSRB1 PE=2 SV=2	MTH711	129	3e-30	COG0229	Conserved domain frequently associated with peptide methionine sulfoxide reductase	K07305	3e-50	195	bdi:100824054	peptide-methionine (R)-S-oxide reductase [EC:1.8.4.12]	GO:0055114//oxidation-reduction process;GO:0006979//response to oxidative stress	GO:0033743//peptide-methionine (R)-S-oxide reductase activity;GO:0008113//peptide-methionine-(S)-S-oxide reductase activity	GO:0009570//chloroplast stroma
novel_mir_101	CL2098.Contig136_All	541	gi|134252250|gb|ABO64857.1|	203.8	1e-51	methionine-R-sulfoxide reductase B4 protein [Capsicum annuum]	gi|224114857|ref|XM_002316839.1|	224	7e-56	Populus trichocarpa methionine sulfoxide reductase type (PtrMsrB2), mRNA	sp|Q0DC89|MSRB1_ORYSJ	191	2e-49	Peptide methionine sulfoxide reductase B1, chloroplastic OS=Oryza sativa subsp. japonica GN=MSRB1 PE=2 SV=2	MTH711	129	2e-30	COG0229	Conserved domain frequently associated with peptide methionine sulfoxide reductase	K07305	3e-50	195	bdi:100824054	peptide-methionine (R)-S-oxide reductase [EC:1.8.4.12]	GO:0055114//oxidation-reduction process;GO:0006979//response to oxidative stress	GO:0033743//peptide-methionine (R)-S-oxide reductase activity;GO:0008113//peptide-methionine-(S)-S-oxide reductase activity	GO:0009570//chloroplast stroma
novel_mir_101	CL2098.Contig137_All	1494	gi|225424128|ref|XP_002280178.1|	445.3	1e-123	PREDICTED: cyclin-D1-binding protein 1 homolog [Vitis vinifera] >gi|297737743|emb|CBI26944.3| unnamed protein product [Vitis vinifera]	gi|356574257|ref|XM_003555219.1|	103	5e-19	PREDICTED: Glycine max uncharacterized protein LOC100800265 (LOC100800265), mRNA	--	--	--	--	--	--	--	--	--	--	--	--	--	--	-	-	-
novel_mir_101	CL2098.Contig138_All	230	--	--	--	--	--	--	--	--	--	--	--	--	--	--	--	--	--	--	--	--	--	--	-	-	-
novel_mir_101	CL2098.Contig139_All	1316	gi|147820925|emb|CAN65048.1|	458.4	1e-127	hypothetical protein VITISV_026363 [Vitis vinifera]	gi|157743424|gb|AC211308.1|	71.9	2e-09	Populus trichocarpa clone POP014-O12, complete sequence	sp|Q84MB3|ACCH1_ARATH	356	2e-98	1-aminocyclopropane-1-carboxylate oxidase homolog 1 OS=Arabidopsis thaliana GN=At1g06620 PE=2 SV=1	PA4191	119	2e-26	COG3491	Isopenicillin N synthase and related dioxygenases	K13229	7e-74	276	zma:541977	2,4-dihydroxy-1,4-benzoxazin-3-one-glucoside dioxygenase [EC:1.14.20.2]	-	GO:0016706//oxidoreductase activity, acting on paired donors, with incorporation or reduction of molecular oxygen, 2-oxoglutarate as one donor, and incorporation of one atom each of oxygen into both donors	-
novel_mir_101	CL2098.Contig140_All	710	--	--	--	--	gi|13429835|dbj|AB049134.1|	93.7	2e-16	Cucurbita moschata CmATS1;1 gene for acyl-(acyl-carrier-protein): glycerol-3-phosphate acyltransferase, complete cds	--	--	--	--	--	--	--	--	--	--	--	--	--	--	-	-	-
novel_mir_101	CL2098.Contig141_All	2600	gi|255583653|ref|XP_002532581.1|	791.2	0	CBL-interacting serine/threonine-protein kinase, putative [Ricinus communis] >gi|223527690|gb|EEF29798.1| CBL-interacting serine/threonine-protein kinase, putative [Ricinus communis]	gi|359479177|ref|XM_002271858.2|	755	0	PREDICTED: Vitis vinifera CBL-interacting protein kinase 18 (CIPK018), mRNA	sp|Q2V452|CIPK3_ARATH	735	0	CBL-interacting serine/threonine-protein kinase 3 OS=Arabidopsis thaliana GN=CIPK3 PE=1 SV=2	ECU01g0630	166	2e-40	COG0515	Serine/threonine protein kinase	K00924	8e-179	625	ath:AT1G30270	[EC:2.7.1.-]	GO:0009628//response to abiotic stimulus;GO:0006468//protein phosphorylation;GO:0009735//response to cytokinin stimulus;GO:0009738//abscisic acid mediated signaling pathway	GO:0004683//calmodulin-dependent protein kinase activity;GO:0005515//protein binding;GO:0005524//ATP binding	GO:0005634//nucleus;GO:0005739//mitochondrion
novel_mir_101	CL2098.Contig142_All	2554	gi|255583653|ref|XP_002532581.1|	791.2	0	CBL-interacting serine/threonine-protein kinase, putative [Ricinus communis] >gi|223527690|gb|EEF29798.1| CBL-interacting serine/threonine-protein kinase, putative [Ricinus communis]	gi|359479177|ref|XM_002271858.2|	755	0	PREDICTED: Vitis vinifera CBL-interacting protein kinase 18 (CIPK018), mRNA	sp|Q2V452|CIPK3_ARATH	735	0	CBL-interacting serine/threonine-protein kinase 3 OS=Arabidopsis thaliana GN=CIPK3 PE=1 SV=2	ECU01g0630	166	2e-40	COG0515	Serine/threonine protein kinase	K00924	8e-179	625	ath:AT1G30270	[EC:2.7.1.-]	GO:0009628//response to abiotic stimulus;GO:0006468//protein phosphorylation;GO:0009735//response to cytokinin stimulus;GO:0009738//abscisic acid mediated signaling pathway	GO:0004683//calmodulin-dependent protein kinase activity;GO:0005515//protein binding;GO:0005524//ATP binding	GO:0005634//nucleus;GO:0005739//mitochondrion
novel_mir_101	CL2098.Contig143_All	2662	gi|255583653|ref|XP_002532581.1|	791.2	0	CBL-interacting serine/threonine-protein kinase, putative [Ricinus communis] >gi|223527690|gb|EEF29798.1| CBL-interacting serine/threonine-protein kinase, putative [Ricinus communis]	gi|359479177|ref|XM_002271858.2|	755	0	PREDICTED: Vitis vinifera CBL-interacting protein kinase 18 (CIPK018), mRNA	sp|Q2V452|CIPK3_ARATH	735	0	CBL-interacting serine/threonine-protein kinase 3 OS=Arabidopsis thaliana GN=CIPK3 PE=1 SV=2	ECU01g0630	166	3e-40	COG0515	Serine/threonine protein kinase	K00924	8e-179	625	ath:AT1G30270	[EC:2.7.1.-]	GO:0009628//response to abiotic stimulus;GO:0006468//protein phosphorylation;GO:0009735//response to cytokinin stimulus;GO:0009738//abscisic acid mediated signaling pathway	GO:0004683//calmodulin-dependent protein kinase activity;GO:0005515//protein binding;GO:0005524//ATP binding	GO:0005634//nucleus;GO:0005739//mitochondrion
novel_mir_101	CL2098.Contig144_All	970	gi|359489136|ref|XP_003633884.1|	58.9	1e-07	PREDICTED: DNA mismatch repair protein Mlh1-like [Vitis vinifera]	gi|350539286|ref|NM_001247712.1|	63.9	3e-07	Solanum lycopersicum MLH1 protein (MLH1), mRNA >gi|126238203|gb|EF071927.1| Solanum lycopersicum MLH1 (MLH1) mRNA, complete cds	--	--	--	--	SPBC1703.04	51.2	3e-06	COG0323	DNA mismatch repair enzyme (predicted ATPase)	K08734	7e-11	55.5	vvi:100854779	DNA mismatch repair protein MLH1	GO:0048316//seed development;GO:0009845//seed germination;GO:0006312//mitotic recombination;GO:0009555//pollen development	GO:0005488//binding	GO:0000790//nuclear chromatin
novel_mir_101	CL2098.Contig145_All	2183	gi|356552697|ref|XP_003544699.1|	167.9	5e-40	PREDICTED: aldehyde dehydrogenase family 3 member H1-like isoform 2 [Glycine max]	gi|357966936|gb|JN831451.1|	272	1e-69	Ziziphus jujuba aldehyde dehydrogenase-like mRNA, complete sequence	sp|Q70DU8|AL3H1_ARATH	538	5e-153	Aldehyde dehydrogenase family 3 member H1 OS=Arabidopsis thaliana GN=ALDH3H1 PE=2 SV=2	alr3672	332	1e-90	COG1012	NAD-dependent aldehyde dehydrogenases	K00128	1e-166	585	gmx:100778722	aldehyde dehydrogenase (NAD+) [EC:1.2.1.3]	GO:0009269//response to desiccation;GO:0009737//response to abscisic acid stimulus;GO:0006081//cellular aldehyde metabolic process;GO:0009651//response to salt stress;GO:0055114//oxidation-reduction process	GO:0004028//3-chloroallyl aldehyde dehydrogenase activity;GO:0004029//aldehyde dehydrogenase (NAD) activity	GO:0005773//vacuole;GO:0016020//membrane;GO:0005783//endoplasmic reticulum;GO:0009536//plastid
novel_mir_101	CL2098.Contig146_All	2254	gi|225435024|ref|XP_002284215.1|	339.3	1e-91	PREDICTED: RNA and export factor-binding protein 2 [Vitis vinifera] >gi|297746115|emb|CBI16171.3| unnamed protein product [Vitis vinifera]	gi|359478983|ref|XM_002284179.2|	137	5e-29	PREDICTED: Vitis vinifera RNA and export factor-binding protein 2-like (LOC100257081), mRNA	sp|Q43349|ROC2_ARATH	67.4	3e-11	29 kDa ribonucleoprotein, chloroplastic OS=Arabidopsis thaliana GN=RBP29 PE=1 SV=2	YDR381w	67	1e-10	COG0724	RNA-binding proteins (RRM domain)	K12881	1e-92	339	vvi:100257081	THO complex subunit 4	-	GO:0003676//nucleic acid binding;GO:0000166//nucleotide binding	-
novel_mir_101	CL2098.Contig147_All	2293	gi|305379592|gb|ADM48810.1|	505.4	1e-141	hydroxyphenylpyruvate reductase [Perilla frutescens]	gi|330318486|gb|HM003277.1|	192	1e-45	Camellia sinensis clone U10BcDNA 2902	sp|P13443|DHGY_CUCSA	135	1e-31	Glycerate dehydrogenase OS=Cucumis sativus GN=HPR-A PE=2 SV=1	AGl379	310	9e-84	COG1052	Lactate dehydrogenase and related dehydrogenases	K15919	5e-142	503	vvi:100251492	hydroxypyruvate reductase 2	GO:0055114//oxidation-reduction process	GO:0047995;GO:0047964//glyoxylate reductase activity;GO:0051287//NAD binding	-
novel_mir_101	CL2098.Contig148_All	1192	gi|356544279|ref|XP_003540581.1|	349.4	6e-95	PREDICTED: probable LRR receptor-like serine/threonine-protein kinase At4g08850-like [Glycine max]	gi|359484062|ref|XM_002270615.2|	67.9	2e-08	PREDICTED: Vitis vinifera probable LRR receptor-like serine/threonine-protein kinase At4g08850-like (LOC100264787), mRNA	sp|Q8VZG8|Y4885_ARATH	303	2e-82	Probable LRR receptor-like serine/threonine-protein kinase At4g08850 OS=Arabidopsis thaliana GN=At4g08850 PE=1 SV=3	CAC1728_1	89.7	9e-18	COG0515	Serine/threonine protein kinase	K13415	7e-62	236	sbi:SORBI_03g012040	protein brassinosteroid insensitive 1 [EC:2.7.10.1 2.7.11.1]	-	GO:0004672//protein kinase activity	-
novel_mir_101	CL2098.Contig149_All	1885	gi|224092166|ref|XP_002309490.1|	360.1	6e-98	predicted protein [Populus trichocarpa] >gi|222855466|gb|EEE93013.1| predicted protein [Populus trichocarpa]	gi|160958194|emb|CU226857.1|	321	1e-84	Populus EST from severe drought-stressed leaves	sp|Q84MC2|LOG8_ARATH	354	8e-98	Cytokinin riboside 5'-monophosphate phosphoribohydrolase LOG8 OS=Arabidopsis thaliana GN=LOG8 PE=1 SV=1	RSc2087	177	7e-44	COG1611	Predicted Rossmann fold nucleotide-binding protein	K06966	2e-93	342	gmx:100306704		-	GO:0042803//protein homodimerization activity;GO:0016829//lyase activity	GO:0005829//cytosol;GO:0005634//nucleus
novel_mir_101	CL2098.Contig150_All	217	--	--	--	--	--	--	--	--	--	--	--	--	--	--	--	--	--	--	--	--	--	--	-	-	-
novel_mir_101	CL2098.Contig151_All	435	--	--	--	--	gi|167493|gb|M61195.1|CUCACC1	63.9	1e-07	Zucchini 1-aminocyclopropane-1-carboxylate synthase (CP-ACC1A and CP-ACC1B) genes, complete cds	--	--	--	--	--	--	--	--	--	--	--	--	--	--	-	-	-
novel_mir_101	CL2098.Contig152_All	346	--	--	--	--	gi|167493|gb|M61195.1|CUCACC1	63.9	9e-08	Zucchini 1-aminocyclopropane-1-carboxylate synthase (CP-ACC1A and CP-ACC1B) genes, complete cds	--	--	--	--	--	--	--	--	--	--	--	--	--	--	-	-	-
novel_mir_101	CL2098.Contig153_All	540	--	--	--	--	gi|13429835|dbj|AB049134.1|	99.6	3e-18	Cucurbita moschata CmATS1;1 gene for acyl-(acyl-carrier-protein): glycerol-3-phosphate acyltransferase, complete cds	--	--	--	--	--	--	--	--	--	--	--	--	--	--	-	-	-
novel_mir_101	CL2098.Contig154_All	224	--	--	--	--	--	--	--	--	--	--	--	--	--	--	--	--	--	--	--	--	--	--	-	-	-
novel_mir_101	CL2098.Contig155_All	257	--	--	--	--	--	--	--	--	--	--	--	--	--	--	--	--	--	--	--	--	--	--	-	-	-
novel_mir_101	CL2098.Contig156_All	261	--	--	--	--	gi|13429835|dbj|AB049134.1|	65.9	2e-08	Cucurbita moschata CmATS1;1 gene for acyl-(acyl-carrier-protein): glycerol-3-phosphate acyltransferase, complete cds	--	--	--	--	--	--	--	--	--	--	--	--	--	--	-	-	-
novel_mir_101	CL2098.Contig157_All	3495	gi|359473951|ref|XP_003631380.1|	77.4	1e-12	PREDICTED: LOW QUALITY PROTEIN: protein NLP7-like [Vitis vinifera]	gi|359473950|ref|XM_003631332.1|	174	4e-40	PREDICTED: Vitis vinifera protein NLP7-like (LOC100263398), mRNA	sp|Q84TH9|NLP7_ARATH	909	0	Protein NLP7 OS=Arabidopsis thaliana GN=NLP7 PE=1 SV=2	slr0599	57	2e-07	COG0515	Serine/threonine protein kinase	K01115	8e-09	61.6	vcn:VOLCADRAFT_99471	phospholipase D [EC:3.1.4.4]	GO:0010167//response to nitrate;GO:0009414//response to water deprivation;GO:0010118//stomatal movement;GO:0042128//nitrate assimilation	GO:0003700//sequence-specific DNA binding transcription factor activity	GO:0005634//nucleus
novel_mir_101	CL2098.Contig158_All	382	--	--	--	--	gi|13429835|dbj|AB049134.1|	63.9	1e-07	Cucurbita moschata CmATS1;1 gene for acyl-(acyl-carrier-protein): glycerol-3-phosphate acyltransferase, complete cds	--	--	--	--	--	--	--	--	--	--	--	--	--	--	-	-	-
novel_mir_101	CL2098.Contig159_All	252	--	--	--	--	--	--	--	--	--	--	--	--	--	--	--	--	--	--	--	--	--	--	-	-	-
novel_mir_101	CL2098.Contig160_All	245	--	--	--	--	gi|13429835|dbj|AB049134.1|	77.8	4e-12	Cucurbita moschata CmATS1;1 gene for acyl-(acyl-carrier-protein): glycerol-3-phosphate acyltransferase, complete cds	--	--	--	--	--	--	--	--	--	--	--	--	--	--	-	-	-
novel_mir_101	CL2098.Contig161_All	839	--	--	--	--	gi|13429835|dbj|AB049134.1|	101	1e-18	Cucurbita moschata CmATS1;1 gene for acyl-(acyl-carrier-protein): glycerol-3-phosphate acyltransferase, complete cds	--	--	--	--	--	--	--	--	--	--	--	--	--	--	-	-	-
novel_mir_101	CL2098.Contig162_All	256	--	--	--	--	--	--	--	--	--	--	--	--	--	--	--	--	--	--	--	--	--	--	-	-	-
novel_mir_101	CL2098.Contig163_All	224	--	--	--	--	--	--	--	--	--	--	--	--	--	--	--	--	--	--	--	--	--	--	-	-	-
novel_mir_101	CL2098.Contig164_All	220	--	--	--	--	gi|13429835|dbj|AB049134.1|	58	4e-06	Cucurbita moschata CmATS1;1 gene for acyl-(acyl-carrier-protein): glycerol-3-phosphate acyltransferase, complete cds	--	--	--	--	--	--	--	--	--	--	--	--	--	--	-	-	-
novel_mir_101	CL2098.Contig165_All	232	--	--	--	--	--	--	--	--	--	--	--	--	--	--	--	--	--	--	--	--	--	--	-	-	-
novel_mir_101	CL2098.Contig166_All	304	--	--	--	--	--	--	--	--	--	--	--	--	--	--	--	--	--	--	--	--	--	--	-	-	-
novel_mir_101	CL2098.Contig167_All	405	--	--	--	--	--	--	--	--	--	--	--	--	--	--	--	--	--	--	--	--	--	--	-	-	-
novel_mir_101	CL2098.Contig168_All	263	--	--	--	--	gi|13429835|dbj|AB049134.1|	93.7	8e-17	Cucurbita moschata CmATS1;1 gene for acyl-(acyl-carrier-protein): glycerol-3-phosphate acyltransferase, complete cds	--	--	--	--	--	--	--	--	--	--	--	--	--	--	-	-	-
novel_mir_101	CL2098.Contig169_All	217	--	--	--	--	gi|51318189|gb|AY603368.1|	61.9	2e-07	Malus x domestica retrotransposon Cassandra, complete sequence	--	--	--	--	--	--	--	--	--	--	--	--	--	--	-	-	-
novel_mir_101	CL2098.Contig170_All	401	--	--	--	--	gi|13429835|dbj|AB049134.1|	133	1e-28	Cucurbita moschata CmATS1;1 gene for acyl-(acyl-carrier-protein): glycerol-3-phosphate acyltransferase, complete cds	--	--	--	--	--	--	--	--	--	--	--	--	--	--	-	-	-
novel_mir_101	CL2098.Contig171_All	237	--	--	--	--	--	--	--	--	--	--	--	--	--	--	--	--	--	--	--	--	--	--	-	-	-
novel_mir_101	CL2098.Contig172_All	202	--	--	--	--	--	--	--	--	--	--	--	--	--	--	--	--	--	--	--	--	--	--	-	-	-
novel_mir_101	CL2098.Contig173_All	298	--	--	--	--	--	--	--	--	--	--	--	--	--	--	--	--	--	--	--	--	--	--	-	-	-
novel_mir_101	CL2098.Contig174_All	404	--	--	--	--	--	--	--	--	--	--	--	--	--	--	--	--	--	--	--	--	--	--	-	-	-
novel_mir_101	CL2098.Contig175_All	527	--	--	--	--	gi|385198424|gb|JQ771310.1|	58	9e-06	Silene vulgaris isolate S9L chromosome 1 mitochondrion, complete sequence	--	--	--	--	--	--	--	--	--	--	--	--	--	--	-	-	-
novel_mir_101	CL2098.Contig176_All	230	--	--	--	--	gi|13429835|dbj|AB049134.1|	63.9	6e-08	Cucurbita moschata CmATS1;1 gene for acyl-(acyl-carrier-protein): glycerol-3-phosphate acyltransferase, complete cds	--	--	--	--	--	--	--	--	--	--	--	--	--	--	-	-	-
novel_mir_101	CL2098.Contig177_All	218	--	--	--	--	gi|13429835|dbj|AB049134.1|	87.7	4e-15	Cucurbita moschata CmATS1;1 gene for acyl-(acyl-carrier-protein): glycerol-3-phosphate acyltransferase, complete cds	--	--	--	--	--	--	--	--	--	--	--	--	--	--	-	-	-
novel_mir_101	CL2098.Contig178_All	460	gi|356572724|ref|XP_003554516.1|	95.9	1e-19	PREDICTED: dol-P-Man:Man(5)GlcNAc(2)-PP-Dol alpha-1,3-mannosyltransferase-like [Glycine max]	gi|13429835|dbj|AB049134.1|	111	6e-22	Cucurbita moschata CmATS1;1 gene for acyl-(acyl-carrier-protein): glycerol-3-phosphate acyltransferase, complete cds	sp|O82244|ALG3_ARATH	91.7	2e-19	Dol-P-Man:Man(5)GlcNAc(2)-PP-Dol alpha-1,3-mannosyltransferase OS=Arabidopsis thaliana GN=ALG3 PE=1 SV=1	--	--	--	--	--	K03845	2e-20	95.9	gmx:100793743	alpha-1,3-mannosyltransferase [EC:2.4.1.258]	GO:0006486//protein glycosylation	GO:0000033//alpha-1,3-mannosyltransferase activity	GO:0016021//integral to membrane;GO:0005783//endoplasmic reticulum
novel_mir_101	CL2098.Contig179_All	773	gi|224095756|ref|XP_002310466.1|	124	2e-27	predicted protein [Populus trichocarpa] >gi|222853369|gb|EEE90916.1| predicted protein [Populus trichocarpa]	gi|291293255|gb|GU362647.1|	60	3e-06	Solanum lycopersicum clone pLRW3-1 HT protein-like (HT-A) gene, complete sequence	sp|Q96502|COL2_ARATH	60.8	8e-10	Zinc finger protein CONSTANS-LIKE 2 OS=Arabidopsis thaliana GN=COL2 PE=1 SV=1	--	--	--	--	--	K12135	8e-09	58.9	aly:ARALYDRAFT_488429	zinc finger protein CONSTANS	GO:0009409//response to cold;GO:0010224//response to UV-B;GO:0006355//regulation of transcription, DNA-dependent	GO:0003700//sequence-specific DNA binding transcription factor activity;GO:0008270//zinc ion binding	GO:0044464//cell part
novel_mir_101	CL2098.Contig180_All	572	--	--	--	--	gi|13429835|dbj|AB049134.1|	69.9	3e-09	Cucurbita moschata CmATS1;1 gene for acyl-(acyl-carrier-protein): glycerol-3-phosphate acyltransferase, complete cds	--	--	--	--	--	--	--	--	--	--	--	--	--	--	-	-	-
novel_mir_101	CL2098.Contig181_All	226	--	--	--	--	--	--	--	--	--	--	--	--	--	--	--	--	--	--	--	--	--	--	-	-	-
novel_mir_101	CL2098.Contig182_All	372	--	--	--	--	--	--	--	--	--	--	--	--	--	--	--	--	--	--	--	--	--	--	-	-	-
novel_mir_101	CL2098.Contig183_All	217	--	--	--	--	--	--	--	--	--	--	--	--	--	--	--	--	--	--	--	--	--	--	-	-	-
novel_mir_101	CL2098.Contig184_All	271	--	--	--	--	--	--	--	--	--	--	--	--	--	--	--	--	--	--	--	--	--	--	-	-	-
novel_mir_101	CL2098.Contig185_All	448	--	--	--	--	gi|13429835|dbj|AB049134.1|	61.9	5e-07	Cucurbita moschata CmATS1;1 gene for acyl-(acyl-carrier-protein): glycerol-3-phosphate acyltransferase, complete cds	--	--	--	--	--	--	--	--	--	--	--	--	--	--	-	-	-
novel_mir_101	CL2098.Contig186_All	1977	gi|359495481|ref|XP_002271412.2|	664.1	0	PREDICTED: protein TRANSPORT INHIBITOR RESPONSE 1 [Vitis vinifera]	gi|224078845|ref|XM_002305615.1|	176	5e-41	Populus trichocarpa f-box family protein (FBL5), mRNA	sp|Q7XVM8|TIR1B_ORYSJ	441	9e-124	Transport inhibitor response 1-like protein Os04g0395600 OS=Oryza sativa subsp. japonica GN=Os04g0395600 PE=2 SV=1	--	--	--	--	--	K14485	3e-122	437	ath:AT3G62980	transport inhibitor response 1	GO:0009734//auxin mediated signaling pathway	GO:0000822//inositol hexakisphosphate binding	-
novel_mir_108	CL2098.Contig187_All	432	--	--	--	--	--	--	--	--	--	--	--	--	--	--	--	--	--	--	--	--	--	--	-	-	-
novel_mir_108	CL2098.Contig188_All	474	--	--	--	--	gi|13429835|dbj|AB049134.1|	58	8e-06	Cucurbita moschata CmATS1;1 gene for acyl-(acyl-carrier-protein): glycerol-3-phosphate acyltransferase, complete cds	--	--	--	--	--	--	--	--	--	--	--	--	--	--	-	-	-
novel_mir_108	CL2098.Contig189_All	1611	gi|224131572|ref|XP_002321120.1|	369.4	8e-101	predicted protein [Populus trichocarpa] >gi|222861893|gb|EEE99435.1| predicted protein [Populus trichocarpa]	gi|356569102|ref|XM_003552697.1|	232	9e-58	PREDICTED: Glycine max solute carrier family 35 member F1-like (LOC100817482), mRNA	--	--	--	--	SPCC320.08	145	2e-34	COG0697	Permeases of the drug/metabolite transporter (DMT) superfamily	K15287	8e-102	369	pop:POPTR_896170	solute carrier family 35, member F1/2	-	-	GO:0005739//mitochondrion;GO:0016020//membrane
novel_mir_108	CL2098.Contig190_All	230	--	--	--	--	--	--	--	--	--	--	--	--	--	--	--	--	--	--	--	--	--	--	-	-	-
novel_mir_108	CL2098.Contig191_All	514	--	--	--	--	gi|13429835|dbj|AB049134.1|	77.8	9e-12	Cucurbita moschata CmATS1;1 gene for acyl-(acyl-carrier-protein): glycerol-3-phosphate acyltransferase, complete cds	--	--	--	--	--	--	--	--	--	--	--	--	--	--	-	-	-
novel_mir_108	CL2098.Contig192_All	1069	gi|225447235|ref|XP_002278171.1|	199.1	8e-50	PREDICTED: uncharacterized protein LOC100253450 [Vitis vinifera]	gi|225447234|ref|XM_002278135.1|	103	3e-19	PREDICTED: Vitis vinifera uncharacterized LOC100253450 (LOC100253450), mRNA	--	--	--	--	--	--	--	--	--	--	--	--	--	--	-	-	-
novel_mir_108	CL2098.Contig193_All	215	--	--	--	--	--	--	--	--	--	--	--	--	--	--	--	--	--	--	--	--	--	--	-	-	-
novel_mir_108	CL2098.Contig194_All	540	--	--	--	--	--	--	--	--	--	--	--	--	--	--	--	--	--	--	--	--	--	--	-	-	-
novel_mir_108	CL2098.Contig195_All	1206	gi|225452702|ref|XP_002282480.1|	261.2	2e-68	PREDICTED: auxin efflux carrier component 1 [Vitis vinifera] >gi|147866288|emb|CAN79928.1| hypothetical protein VITISV_042448 [Vitis vinifera] >gi|296082857|emb|CBI22158.3| unnamed protein product [Vitis vinifera]	gi|377551757|gb|JQ388714.1|	155	1e-34	Corylus avellana clone CA703-72F19, complete sequence	sp|Q5SMQ9|PIN1_ORYSJ	193	2e-49	Auxin efflux carrier component 1 OS=Oryza sativa subsp. japonica GN=PIN1 PE=2 SV=1	--	--	--	--	--	K13947	2e-69	261	vvi:100259491	auxin efflux carrier family	GO:0055085//transmembrane transport	-	GO:0016023//cytoplasmic membrane-bounded vesicle;GO:0016021//integral to membrane
novel_mir_108	CL2098.Contig196_All	755	--	--	--	--	gi|167493|gb|M61195.1|CUCACC1	69.9	3e-09	Zucchini 1-aminocyclopropane-1-carboxylate synthase (CP-ACC1A and CP-ACC1B) genes, complete cds	--	--	--	--	--	--	--	--	--	--	--	--	--	--	-	-	-
novel_mir_108	CL2098.Contig197_All	2370	gi|356576887|ref|XP_003556561.1|	482.3	1e-134	PREDICTED: uncharacterized protein LOC100810934 [Glycine max]	gi|356534494|ref|XM_003535741.1|	216	8e-53	PREDICTED: Glycine max uncharacterized protein LOC100775775 (LOC100775775), mRNA	--	--	--	--	--	--	--	--	--	K14306	4e-07	55.5	ath:AT2G45000	nuclear pore complex protein Nup62	-	-	-
novel_mir_108	CL2098.Contig198_All	1137	--	--	--	--	--	--	--	--	--	--	--	--	--	--	--	--	--	--	--	--	--	--	-	-	-
novel_mir_108	CL2098.Contig199_All	703	--	--	--	--	--	--	--	--	--	--	--	--	--	--	--	--	--	--	--	--	--	--	-	-	-
novel_mir_108	CL2098.Contig200_All	609	gi|224146324|ref|XP_002325965.1|	62	6e-09	predicted protein [Populus trichocarpa] >gi|222862840|gb|EEF00347.1| predicted protein [Populus trichocarpa]	--	--	--	--	--	--	--	--	RC1361	48.9	6e-06	COG0323	DNA mismatch repair enzyme (predicted ATPase)	K08734	7e-10	62	pop:POPTR_913572	DNA mismatch repair protein MLH1	GO:0048316//seed development;GO:0009845//seed germination;GO:0006312//mitotic recombination;GO:0009555//pollen development	GO:0005488//binding	GO:0000790//nuclear chromatin
novel_mir_108	CL2098.Contig201_All	970	gi|359489136|ref|XP_003633884.1|	58.9	1e-07	PREDICTED: DNA mismatch repair protein Mlh1-like [Vitis vinifera]	gi|350539286|ref|NM_001247712.1|	63.9	3e-07	Solanum lycopersicum MLH1 protein (MLH1), mRNA >gi|126238203|gb|EF071927.1| Solanum lycopersicum MLH1 (MLH1) mRNA, complete cds	--	--	--	--	SPBC1703.04	51.2	3e-06	COG0323	DNA mismatch repair enzyme (predicted ATPase)	K08734	7e-11	55.5	vvi:100854779	DNA mismatch repair protein MLH1	GO:0048316//seed development;GO:0009845//seed germination;GO:0006312//mitotic recombination;GO:0009555//pollen development	GO:0005488//binding	GO:0000790//nuclear chromatin
novel_mir_108	CL2098.Contig202_All	2931	gi|90856223|gb|ABE01402.1|	121.3	0	ATP-sulfurylase [Camellia sinensis]	gi|292684172|dbj|AK339734.1|	434	1e-118	Lotus japonicus cDNA, clone: LjFL3-071-AD08, HTC	sp|Q43870|APS2_ARATH	563	0	ATP sulfurylase 2 OS=Arabidopsis thaliana GN=APS2 PE=1 SV=1	YJR010w	152	2e-36	COG2046	ATP sulfurylase (sulfate adenylyltransferase)	K13811	0	646	vvi:100259752	3'-phosphoadenosine 5'-phosphosulfate synthase [EC:2.7.7.4 2.7.1.25]	GO:0000103//sulfate assimilation;GO:0048573//photoperiodism, flowering;GO:0019252//starch biosynthetic process;GO:0046686//response to cadmium ion	GO:0004781//sulfate adenylyltransferase (ATP) activity;GO:0008878//glucose-1-phosphate adenylyltransferase activity	GO:0030931//heterotetrameric ADPG pyrophosphorylase complex;GO:0009570//chloroplast stroma;GO:0005886//plasma membrane;GO:0048046//apoplast
novel_mir_108	CL2098.Contig203_All	2991	gi|90856223|gb|ABE01402.1|	118.2	0	ATP-sulfurylase [Camellia sinensis]	gi|292684172|dbj|AK339734.1|	482	1e-132	Lotus japonicus cDNA, clone: LjFL3-071-AD08, HTC	sp|Q9LIK9|APS1_ARATH	638	0	ATP sulfurylase 1, chloroplastic OS=Arabidopsis thaliana GN=APS1 PE=1 SV=1	YJR010w	163	1e-39	COG2046	ATP sulfurylase (sulfate adenylyltransferase)	K13811	0	643	rcu:RCOM_0910820	3'-phosphoadenosine 5'-phosphosulfate synthase [EC:2.7.7.4 2.7.1.25]	GO:0000103//sulfate assimilation	GO:0004781//sulfate adenylyltransferase (ATP) activity	GO:0009536//plastid
novel_mir_108	CL2098.Contig204_All	201	--	--	--	--	--	--	--	--	--	--	--	--	--	--	--	--	--	--	--	--	--	--	-	-	-
novel_mir_108	CL2098.Contig205_All	861	gi|356496561|ref|XP_003517135.1|	275	9e-73	PREDICTED: rab proteins geranylgeranyltransferase component A-like [Glycine max]	gi|359476980|ref|XM_002273095.2|	79.8	4e-12	PREDICTED: Vitis vinifera rab proteins geranylgeranyltransferase component A 2-like (LOC100262556), mRNA	--	--	--	--	YER136w	49.3	8e-06	COG5044	RAB proteins geranylgeranyltransferase component A (RAB escort protein)	--	--	--	--	--	GO:0009987//cellular process;GO:0015031//protein transport	GO:0005093//Rab GDP-dissociation inhibitor activity	-
novel_mir_108	CL2098.Contig206_All	291	--	--	--	--	--	--	--	--	--	--	--	--	--	--	--	--	--	--	--	--	--	--	-	-	-
novel_mir_108	CL2098.Contig207_All	629	--	--	--	--	gi|167493|gb|M61195.1|CUCACC1	61.9	7e-07	Zucchini 1-aminocyclopropane-1-carboxylate synthase (CP-ACC1A and CP-ACC1B) genes, complete cds	--	--	--	--	--	--	--	--	--	--	--	--	--	--	-	-	-
novel_mir_108	CL2098.Contig208_All	781	--	--	--	--	gi|13429835|dbj|AB049134.1|	63.9	2e-07	Cucurbita moschata CmATS1;1 gene for acyl-(acyl-carrier-protein): glycerol-3-phosphate acyltransferase, complete cds	--	--	--	--	--	--	--	--	--	--	--	--	--	--	-	-	-
novel_mir_108	CL2098.Contig209_All	200	--	--	--	--	--	--	--	--	--	--	--	--	--	--	--	--	--	--	--	--	--	--	-	-	-
novel_mir_108	CL2098.Contig210_All	351	--	--	--	--	--	--	--	--	--	--	--	--	--	--	--	--	--	--	--	--	--	--	-	-	-
novel_mir_108	CL2098.Contig211_All	1934	gi|224092554|ref|XP_002309659.1|	805.1	0	predicted protein [Populus trichocarpa] >gi|222855635|gb|EEE93182.1| predicted protein [Populus trichocarpa]	gi|359475851|ref|XM_002285349.2|	914	0	PREDICTED: Vitis vinifera aspartate aminotransferase, chloroplastic-like (LOC100242364), mRNA	sp|P46248|AAT5_ARATH	768	0	Aspartate aminotransferase, chloroplastic OS=Arabidopsis thaliana GN=ASP5 PE=1 SV=2	SPBC725.01	374	4e-103	COG1448	Aspartate/tyrosine/aromatic aminotransferase	K00811	0	805	pop:POPTR_654206	aspartate aminotransferase, chloroplastic [EC:2.6.1.1]	GO:0006103//2-oxoglutarate metabolic process;GO:0009409//response to cold;GO:0009058//biosynthetic process;GO:0006536//glutamate metabolic process;GO:0046686//response to cadmium ion;GO:0006531//aspartate metabolic process	GO:0004069//L-aspartate:2-oxoglutarate aminotransferase activity;GO:0033853//aspartate-prephenate aminotransferase activity;GO:0033854//glutamate-prephenate aminotransferase activity;GO:0030170//pyridoxal phosphate binding	GO:0009941//chloroplast envelope;GO:0009570//chloroplast stroma;GO:0005759//mitochondrial matrix;GO:0010319//stromule;GO:0048046//apoplast
novel_mir_108	CL2098.Contig212_All	1885	gi|224092166|ref|XP_002309490.1|	360.1	6e-98	predicted protein [Populus trichocarpa] >gi|222855466|gb|EEE93013.1| predicted protein [Populus trichocarpa]	gi|160958194|emb|CU226857.1|	321	1e-84	Populus EST from severe drought-stressed leaves	sp|Q84MC2|LOG8_ARATH	354	8e-98	Cytokinin riboside 5'-monophosphate phosphoribohydrolase LOG8 OS=Arabidopsis thaliana GN=LOG8 PE=1 SV=1	RSc2087	177	7e-44	COG1611	Predicted Rossmann fold nucleotide-binding protein	K06966	2e-93	342	gmx:100306704		-	GO:0042803//protein homodimerization activity;GO:0016829//lyase activity	GO:0005829//cytosol;GO:0005634//nucleus
novel_mir_108	CL2098.Contig213_All	222	--	--	--	--	--	--	--	--	--	--	--	--	--	--	--	--	--	--	--	--	--	--	-	-	-
novel_mir_108	CL2098.Contig214_All	293	--	--	--	--	gi|167493|gb|M61195.1|CUCACC1	65.9	2e-08	Zucchini 1-aminocyclopropane-1-carboxylate synthase (CP-ACC1A and CP-ACC1B) genes, complete cds	--	--	--	--	--	--	--	--	--	--	--	--	--	--	-	-	-
novel_mir_108	CL2098.Contig215_All	431	--	--	--	--	--	--	--	--	--	--	--	--	--	--	--	--	--	--	--	--	--	--	-	-	-
novel_mir_108	CL2098.Contig216_All	242	--	--	--	--	gi|13429835|dbj|AB049134.1|	65.9	2e-08	Cucurbita moschata CmATS1;1 gene for acyl-(acyl-carrier-protein): glycerol-3-phosphate acyltransferase, complete cds	--	--	--	--	--	--	--	--	--	--	--	--	--	--	-	-	-
novel_mir_108	CL2098.Contig217_All	345	--	--	--	--	--	--	--	--	--	--	--	--	--	--	--	--	--	--	--	--	--	--	-	-	-
novel_mir_108	CL2098.Contig218_All	576	gi|359479527|ref|XP_003632284.1|	53.9	1e-06	PREDICTED: fatty acyl-CoA reductase 3 isoform 2 [Vitis vinifera]	--	--	--	--	--	--	--	--	--	--	--	--	--	K13356	2e-07	53.9	vvi:100259719	fatty acyl-CoA reductase [EC:1.2.1.-]	-	-	-
novel_mir_108	CL2098.Contig219_All	275	--	--	--	--	gi|13429835|dbj|AB049134.1|	83.8	8e-14	Cucurbita moschata CmATS1;1 gene for acyl-(acyl-carrier-protein): glycerol-3-phosphate acyltransferase, complete cds	--	--	--	--	--	--	--	--	--	--	--	--	--	--	-	-	-
novel_mir_108	CL2098.Contig220_All	334	--	--	--	--	--	--	--	--	--	--	--	--	--	--	--	--	--	--	--	--	--	--	-	-	-
novel_mir_108	CL2098.Contig221_All	522	--	--	--	--	--	--	--	--	--	--	--	--	--	--	--	--	--	--	--	--	--	--	-	-	-
novel_mir_108	CL2098.Contig222_All	207	--	--	--	--	--	--	--	--	--	--	--	--	--	--	--	--	--	--	--	--	--	--	-	-	-
novel_mir_108	CL2098.Contig223_All	318	--	--	--	--	gi|13429835|dbj|AB049134.1|	200	6e-49	Cucurbita moschata CmATS1;1 gene for acyl-(acyl-carrier-protein): glycerol-3-phosphate acyltransferase, complete cds	--	--	--	--	--	--	--	--	--	--	--	--	--	--	-	-	-
novel_mir_108	CL2098.Contig224_All	241	--	--	--	--	--	--	--	--	--	--	--	--	--	--	--	--	--	--	--	--	--	--	-	-	-
novel_mir_108	CL2098.Contig225_All	241	--	--	--	--	gi|13429835|dbj|AB049134.1|	89.7	1e-15	Cucurbita moschata CmATS1;1 gene for acyl-(acyl-carrier-protein): glycerol-3-phosphate acyltransferase, complete cds	--	--	--	--	--	--	--	--	--	--	--	--	--	--	-	-	-
novel_mir_108	CL2098.Contig226_All	265	--	--	--	--	--	--	--	--	--	--	--	--	--	--	--	--	--	--	--	--	--	--	-	-	-
novel_mir_108	CL2098.Contig227_All	767	gi|33340591|gb|AAQ14866.1|AF329450_1	93.2	4e-18	transcription factor BZIP1 [Catharanthus roseus]	gi|147795290|emb|AM438711.2|	63.9	2e-07	Vitis vinifera contig VV78X203041.4, whole genome shotgun sequence	sp|Q9M7Q3|AI5L6_ARATH	85.5	3e-17	ABSCISIC ACID-INSENSITIVE 5-like protein 6 OS=Arabidopsis thaliana GN=ABF3 PE=1 SV=1	--	--	--	--	--	K14432	1e-18	91.7	pop:POPTR_767577	ABA responsive element binding factor	GO:0006355//regulation of transcription, DNA-dependent	GO:0003700//sequence-specific DNA binding transcription factor activity;GO:0043565//sequence-specific DNA binding;GO:0046983//protein dimerization activity	GO:0005634//nucleus
novel_mir_108	CL2098.Contig228_All	496	gi|83853821|gb|ABC47854.1|	62	3e-09	bzip transcription factor [Glycine max]	gi|13429835|dbj|AB049134.1|	61.9	5e-07	Cucurbita moschata CmATS1;1 gene for acyl-(acyl-carrier-protein): glycerol-3-phosphate acyltransferase, complete cds	sp|Q9M7Q3|AI5L6_ARATH	58.5	2e-09	ABSCISIC ACID-INSENSITIVE 5-like protein 6 OS=Arabidopsis thaliana GN=ABF3 PE=1 SV=1	--	--	--	--	--	K14432	4e-10	62	gmx:100819313	ABA responsive element binding factor	GO:0009414//response to water deprivation;GO:0009651//response to salt stress;GO:0006355//regulation of transcription, DNA-dependent;GO:0009738//abscisic acid mediated signaling pathway	GO:0043565//sequence-specific DNA binding;GO:0046983//protein dimerization activity;GO:0003700//sequence-specific DNA binding transcription factor activity	GO:0005634//nucleus
novel_mir_108	CL2098.Contig229_All	324	--	--	--	--	gi|13429835|dbj|AB049134.1|	65.9	2e-08	Cucurbita moschata CmATS1;1 gene for acyl-(acyl-carrier-protein): glycerol-3-phosphate acyltransferase, complete cds	--	--	--	--	--	--	--	--	--	--	--	--	--	--	-	-	-
novel_mir_108	CL2098.Contig230_All	469	--	--	--	--	gi|13429835|dbj|AB049134.1|	172	2e-40	Cucurbita moschata CmATS1;1 gene for acyl-(acyl-carrier-protein): glycerol-3-phosphate acyltransferase, complete cds	--	--	--	--	--	--	--	--	--	--	--	--	--	--	-	-	-
novel_mir_108	CL2098.Contig231_All	371	--	--	--	--	gi|13429835|dbj|AB049134.1|	172	2e-40	Cucurbita moschata CmATS1;1 gene for acyl-(acyl-carrier-protein): glycerol-3-phosphate acyltransferase, complete cds	--	--	--	--	--	--	--	--	--	--	--	--	--	--	-	-	-
novel_mir_108	CL2098.Contig232_All	398	--	--	--	--	--	--	--	--	--	--	--	--	--	--	--	--	--	--	--	--	--	--	-	-	-
novel_mir_108	CL2098.Contig233_All	217	--	--	--	--	--	--	--	--	--	--	--	--	--	--	--	--	--	--	--	--	--	--	-	-	-
novel_mir_108	CL2098.Contig234_All	283	gi|307135870|gb|ADN33737.1|	55.1	3e-07	hypothetical protein [Cucumis melo subsp. melo]	gi|326554868|gb|EU832918.1|	73.8	8e-11	Gahnia baniensis photosystem II D2 protein (psbD) and photosystem II CP43 protein (psbC) genes, partial cds; chloroplast	--	--	--	--	--	--	--	--	--	--	--	--	--	--	-	-	-
novel_mir_108	CL2098.Contig235_All	260	--	--	--	--	--	--	--	--	--	--	--	--	--	--	--	--	--	--	--	--	--	--	-	-	-
novel_mir_113	CL2098.Contig236_All	353	--	--	--	--	--	--	--	--	--	--	--	--	--	--	--	--	--	--	--	--	--	--	-	-	-
novel_mir_142	CL2098.Contig237_All	200	--	--	--	--	gi|34550083|gb|AY379783.1|	63.9	5e-08	Cucurbita pepo galactinol synthase (GAS1) gene, partial cds	--	--	--	--	--	--	--	--	--	--	--	--	--	--	-	-	-
novel_mir_142	CL2098.Contig238_All	3104	gi|356574264|ref|XP_003555270.1|	1401.7	0	PREDICTED: ALG-2 interacting protein X-like [Glycine max]	gi|225424147|ref|XM_002283945.1|	971	0	PREDICTED: Vitis vinifera ALG-2 interacting protein X-like (LOC100245656), mRNA	sp|P08297|NO75_SOYBN	61.2	3e-09	Early nodulin-75 OS=Glycine max GN=ENOD2A PE=2 SV=2	Rv3876	55.1	7e-07	COG0455	ATPases involved in chromosome partitioning	K12200	0	1401	gmx:100802927	programmed cell death 6-interacting protein	-	-	-
